# Supplementary material
Source: bioRxiv or medRxiv preprint supplement (https://www.medrxiv.org/highwire/filestream/68156/field_highwire_adjunct_files/19/19001024-4.pdf)
Supplement: Supplementary file [file 19001024-4.pdf]

## Appendix 4 - extensive overview of existing studies that touch some aspects of BeLOVE

### Important recent Acute Heart Failure (AHF) cohorts

| Name                                                                                                                                        | Main Objective                                                                                                                                                     | Status                            | Study type                                                                           | n & observation period                | Participant characteristics                                                   | Main Outcome                      | Acute Phenotyping                              | Follow up                                                            |
|---------------------------------------------------------------------------------------------------------------------------------------------|--------------------------------------------------------------------------------------------------------------------------------------------------------------------|-----------------------------------|--------------------------------------------------------------------------------------|---------------------------------------|-------------------------------------------------------------------------------|-----------------------------------|------------------------------------------------|----------------------------------------------------------------------|
| ADHERE Core III - Acute Decompensated Heart Failure Registry [1,2]<br><br>NCT00366639                                                       | to compile a clinical database on the strategy for the medical management of patients hospitalized with acute Heart Failure (HF).                                  | Completed (Oct 2001 – Oct 2006)   | multi-center (USA) prospective observational cohort (registry)                       | n=24118<br><br>no scheduled follow up | adults hospitalized for AHF                                                   | Acute clinical course             | Clinical data and history                      | none                                                                 |
| French Observatory of Acute Heart Failure (OFICA) [3]<br><br>NCT01080937                                                                    | to study the changing characteristics of patients and practices in the "real world" and their impact on the prognosis of patients admitted for acute heart failure | Completed (March 2009- Feb 2011)  | multi-center (France) prospective observational cohort                               | n= 1818<br><br>3 months               | adults hospitalized for AHF                                                   | Acute and 3 month clinical course | Clinical data and history                      | <u>3 month (telephone)</u><br><br>Clinical outcome                   |
| Clinical profile, contemporary management and one-year mortality in patients with severe acute heart failure syndromes: The EFICA study [4] | to know more about of the epidemiology of acute decompensated heart failure (ADHF) in patients admitted to intensive and coronary care units (ICU/CCU)             | Completed (April 2011-April 2011) | multi-center (France) prospective observational cohort                               | n= 599<br><br>1 year                  | Adults admitted to an ICU or CCU with signs and or symptoms of AHF            | Mortality at 1 month and 1 year   | Clinical data and history                      | <u>4 weeks &amp; 1 year</u><br><br>Survival                          |
| European Society of Cardiology Heart Failure Pilot and Long-Term Registry (ESC-HF-LT) [5, 7, 13]                                            | to describe clinical epidemiology and 1-year outcomes of outpatients and inpatients with heart failure (HF)                                                        | Completed (Oct 2009- March 2010)  | multi-center, international (12 European countries) prospective observational cohort | n= 5118<br><br>1 year                 | Adult outpatients with chronic HF (63%) and inpatients admitted for AHF (37%) | All-cause-mortality at 1 year     | Clinical data and History                      | <u>1 year</u><br><br>All-cause mortality<br><br>Hospitalization rate |
| EuroHeart Failure Survey II (EHFS II): a survey on hospitalized acute heart failure                                                         | to assess patient characteristics, aetiology, treatment, and outcome of acute                                                                                      | Completed ( Oct 2004 – Aug 2005)  | multi-center international (30 European countries)                                   | n= 3580<br><br>no scheduled Follow up | Adults hospitalized with AHF                                                  | Acute clinical course             | AHF-classification according to ESC guidelines | none                                                                 |

|                                                                                                                                         |                                                                                                                                                                                          |                                  |                                                                             |                                                          |                                                                                                                                              |                                                                                                   |                                                     |                                                                                                                                                   |
|-----------------------------------------------------------------------------------------------------------------------------------------|------------------------------------------------------------------------------------------------------------------------------------------------------------------------------------------|----------------------------------|-----------------------------------------------------------------------------|----------------------------------------------------------|----------------------------------------------------------------------------------------------------------------------------------------------|---------------------------------------------------------------------------------------------------|-----------------------------------------------------|---------------------------------------------------------------------------------------------------------------------------------------------------|
| patients: description of population. [6]                                                                                                | heart failure (AHF) in Europe in relation to the guidelines on the diagnosis and treatment of AHF published by the ESC                                                                   |                                  | prospective observational cohort                                            |                                                          |                                                                                                                                              |                                                                                                   | Clinical data and history                           |                                                                                                                                                   |
| Care Pathways of Acute Heart Failure Patients: Impact on In-hospital Mortality. A French National Prospective Survey [8]<br>NCT03903198 | to describe the different pre-hospital and in-hospital pathways of patients with acute heart failure (AHF) and their association with in-hospital mortality                              | Completed (June 2014-Oct 2018)   | multi-center (France) prospective observational cohort                      | n= 3677<br>no details on FU period per participant given | Adults hospitalized with AHF                                                                                                                 | Association between hospitalization in cardiology and in-hospital mortality                       | Clinical data and history                           | "first recourse" (no further details given)                                                                                                       |
| Determining When Patients Hospitalized With Acute Heart Failure Can Be Safely Sent Home (The DECIDE Study) (DECIDE) [9]<br>NCT00911703  | to determine if certain findings (blood tests, symptom improvement, etc.) after acute heart failure treatment can identify a group of patients who are safe for early hospital discharge | Completed (Aug 2008-Oct 2015)    | multi-center (USA) prospective observational cohort                         | n= 835<br>1 month                                        | Adults with previously documented EF > 50% who present to and ER with AHF                                                                    | Heart –failure related adverse events                                                             | Clinical data (within 1 hour of initial ER therapy) | <u>5 days and 1 month</u><br>Adverse events                                                                                                       |
| Permanent Observatory of Heart Failure (ODIN) [10]<br>NCT01091441                                                                       | (not specified by authors, presumably:) to evaluate the effect of a national education program (I-CARE) for patients with heart failure on 2 year mortality and morbidity                | Completed (Feb 2007-July 2014)   | multi-center (France) prospective observational cohort                      | n= 3248<br>2 years                                       | pts. with HF cared for in centers participating in I-CARE; pts are attributed to a group that did vs. a group that did not receive education | Event-free survival (all cause death)                                                             | not specified                                       | <u>Periodic, up to 2 years</u><br>All-cause mortality<br>Recurrence of heart failure<br>Therapy<br>Number of pts with adverse events              |
| Heart Failure Optimization Study (HF-Opt) [11]<br>NCT03016754                                                                           | to test the hypothesis that in pts with newly diagnosed HF and prescribed wearable cardioverter defibrillator use additional Ejection Fraction (EF) recovery                             | Recruiting (Mar 2017 – Jan 2020) | multi-center (30-60 sites, USA and Europe) prospective observational cohort | n= 750<br>1 year                                         | Adults who were prescribed a wearable cardioverter-defibrillator (WCD) ≤ 10 days post-discharge after                                        | <u>at 6 months:</u><br>ending WCD use without need for ICD (EF improved, negligible SCD risk) vs. | not specified                                       | <u>Day 30 (pre study)</u><br>Early clinical outcome<br><u>6 month</u><br>Primary outcome measures + incidence of other arrhythmias, number of ICD |

|                                                                                                                                                                                               |                                                                                                                                                                                                     |                                                      |                                                                                              |                    |                                                                                                                                                                                                                                                           |                                                                                                             |                           |                                                                                                                                        |
|-----------------------------------------------------------------------------------------------------------------------------------------------------------------------------------------------|-----------------------------------------------------------------------------------------------------------------------------------------------------------------------------------------------------|------------------------------------------------------|----------------------------------------------------------------------------------------------|--------------------|-----------------------------------------------------------------------------------------------------------------------------------------------------------------------------------------------------------------------------------------------------------|-------------------------------------------------------------------------------------------------------------|---------------------------|----------------------------------------------------------------------------------------------------------------------------------------|
|                                                                                                                                                                                               | occurs between 90 and 180 days as Guideline Directed Medical Therapy (GDMT) is achieved                                                                                                             |                                                      |                                                                                              |                    | hospitalization for a primary reason of new onset HF ( $\leq 30$ days since first HF hospitalization), with ischemic or non-ischemic cardiomyopathy, and have used the WCD for no more than 30 (part 1) or 90 days (part 2) AND who had an EF $\leq 35\%$ | continue WCD (EF improved, but continued SCD risk)vs. meeting GDMT (EF not improved and continued SCD risk) |                           | schocks + WCD efficacy in ventricular arrhythmia<br><u>1 year</u><br>mortality + healthcare costs+ complications from extended GCD use |
| Baseline characteristics and hospital mortality in the Acute Heart Failure Database (AHEAD) Main registry [12]                                                                                | to assess patient characteristics, etiology, treatment and outcome of AHF                                                                                                                           | not specified (recruiting from Sep 2006 to Oct 2009) | multi-center (Czech Republic) prospective observational cohort                               | n= 4153            | Adults hospitalized with AHF                                                                                                                                                                                                                              | Mortality, clinical course                                                                                  | Clinical data and History | <u>"long term"</u> (not specified)<br>mortality                                                                                        |
| Clinical presentation and outcome by age categories in acute heart failure: results from an international observational cohort (Global ResEARch on acute conditions Team, GREAT network) [14] | to assess, according to age groups, patients' characteristics according to region of origin, the chronic therapeutic management, prognostic utility of clinical variables, and natriuretic peptides | Recruiting                                           | multi-center, international (USA, Europe) prospective observational cohort                   | n= 14758<br>1 year | Adults attending an ER with AHF                                                                                                                                                                                                                           | Clinical course<br>Association of e.g. elevated blood glucose [16] and body mass index [17] with mortality  | Clinical data and History | <u>30 days + 1 year</u><br>mortality rate                                                                                              |
| Acute heart failure in elderly patients: worse outcomes and differential utility of standard prognostic variables. Insights from the PROTECT trial [15]                                       | to determine the influence of different older age groups on baseline characteristics and outcomes in the participants of the randomized controlled                                                  | Completed                                            | prospective; RCT (report of observations on the course of participants in the PROTECT trial) | n= 2033<br>1 year  | Adults hospitalized with AHF and known history of HF requiring diuretic treatment; pts. were randomized to i.v. therapy                                                                                                                                   | Mortality and rehospitalization with respect to participants age (primary endpoint of the original RCT was  | Clinical data and History | <u>7 &amp; 30 days</u><br>mortality<br>cardiovascular or renal hospitalization<br><u>1 year</u>                                        |

|                                                                                                                                                             |                                                                                                                                                                                                                                                                                 |                                   |                                                                                                                                                   |                                       |                                                                                               |                                                                                                                                                         |                                                     |                                                                       |
|-------------------------------------------------------------------------------------------------------------------------------------------------------------|---------------------------------------------------------------------------------------------------------------------------------------------------------------------------------------------------------------------------------------------------------------------------------|-----------------------------------|---------------------------------------------------------------------------------------------------------------------------------------------------|---------------------------------------|-----------------------------------------------------------------------------------------------|---------------------------------------------------------------------------------------------------------------------------------------------------------|-----------------------------------------------------|-----------------------------------------------------------------------|
|                                                                                                                                                             | PROTECT trial (median age 72yrs)                                                                                                                                                                                                                                                |                                   |                                                                                                                                                   |                                       | with rolofylline vs. placebo                                                                  | treatment success)                                                                                                                                      |                                                     | mortality                                                             |
| Multicenter Prospective Observational Study on Acute and Chronic Heart Failure: One-Year Follow-up Results of IN-HF (Italian Network on Heart Failure) [18] | representative database of the current HF population (AHF and CHF) in Italy with systematic 1-year follow-up and investigation of clinical profiles, contemporary treatment, outcome rates, and their predictors in both AHF and CHF cohorts                                    | Completed                         | multicenter (Italy) prospective observational cohort                                                                                              | n= 5610<br>min. 1 year, up to 2 years | Adults hospitalized for AHF (n= 1855) or receiving outpatient treatment for chronic HF (3755) | Mortality and hospitalization rates at 1 year in AHF vs. CHF pts.                                                                                       | Clinical data and History                           | <u>1 year</u><br>mortality<br>hospitalization rates                   |
| Risk and predictors of readmission for heart failure following a myocardial infarction between 2004 and 2013: A Swedish nationwide observational study [19] | to study the risk and predictors of late-onset heart failure (LOHF) and the composite event of LOHF or death after acute myocardial infarction (AMI)                                                                                                                            | Completed (2004-2013 )            | Observational study of all patients with acute myocardial infarction entered in the Swedish nationwide registry SWEDEHEART between 2004 and 2013) | n= 150566<br>5 years                  | AMI, data entered in SWEDEHEART between 2004 and 2013                                         | LOHF and mortality                                                                                                                                      | Clinical data and History                           | <u>1 year, 2 year, 5 year</u><br>LOHF<br>mortality                    |
| Prospective Registry of Acute Heart Failure. [20]<br><br>NCT02444416                                                                                        | to create an observational registry of patients hospitalized for AHF to determine the prevalence of etiologies and the prognostic factors – specifically acute renal failure- of AHF and to establish the optimal initial assessment of patients hospitalized for heart failure | Recruiting (Dec 2014 – June 2019) | Mono-center (University Geneva, Switzerland) prospective observational cohort                                                                     | n= 1200<br>2 years                    | Adults hospitalized for AHF                                                                   | Prevalence of different clinical AHF presentations and triggers as well as prognostic factors at baseline; rehospitalization and mortality at follow up | Blood sampling/DNA<br><br>Clinical data and History | <u>1 + 3months, 1 + 2 years</u><br><br>Rehospitalization<br>Mortality |

|                                                                                                                                                                                                                                     |                                                                                                                                                                                                                                                                                                                   |                                  |                                                                     |                                   |                                                                  |                                                                                                                                                        |                                                                  |                                                                           |
|-------------------------------------------------------------------------------------------------------------------------------------------------------------------------------------------------------------------------------------|-------------------------------------------------------------------------------------------------------------------------------------------------------------------------------------------------------------------------------------------------------------------------------------------------------------------|----------------------------------|---------------------------------------------------------------------|-----------------------------------|------------------------------------------------------------------|--------------------------------------------------------------------------------------------------------------------------------------------------------|------------------------------------------------------------------|---------------------------------------------------------------------------|
| Epidemiology and Prognostic of the Acute Heart Failure in Northeast of France (EPICAL 2) [21]                                                                                                                                       | to describe the characteristics of the patients affected by acute heart failure and to identify prognostic factors, in particular related to care                                                                                                                                                                 | Unknown (Jan 2011-May 2017)      | multi-center (France) prospective observational cohort              | n= 2500<br>3 years                | Adults hospitalized for AHF or developing AHF while hospitalized | Incidence of AHF in a certain region of France                                                                                                         | Blood sampling/DNA<br>Urine samples<br>Clinical data and History | <u>Baseline, 6 months, 1,2, 3 years</u><br>mortality<br>rehospitalization |
| Organized Program to Initiate Lifesaving Treatment in Hospitalized Patients With Heart Failure (OPTIMIZE-HF): An Internet-based Registry and Process of Care Improvement Program for Heart Failure Patients [22]<br><br>NCT00344513 | in an interventional program to improve medical care and education of HF pts. a registry component is designed to evaluate the demographic, pathophysiologic, clinical, treatment, and outcome characteristics of patients hospitalized with heart failure.                                                       | Completed (Dec 2002 – June 2005) | prospective interventional non-randomized open-label                | n= 50000                          | Adults hospitalized for HF                                       | Evaluate the number and percentage of eligible patients who are discharged on optimal therapy. Evaluate all HF indicators recommended by JCAHO and CMS | Clinical data and History                                        | <u>Discharge, 3 and 3 months</u><br>clinical outcome                      |
| Clinical presentation, management and outcomes in the Acute Heart Failure Global Survey of Standard Treatment (ALARM-HF). [23]                                                                                                      | survey (by questionnaire) to describe characteristics and management of AHF among various countries, to compare patients with de novo AHF versus patients with a pre-existing episode of AHF, and to describe subpopulations hospitalized in intensive care unit (ICU) versus cardiac care unit (CCU) versus ward | Completed                        | multi-center, international (666 hospitals, four continents) survey | n= 4953<br>no scheduled follow up | Adults hospitalized for AHF                                      | Clinical course                                                                                                                                        | Clinical course                                                  | none                                                                      |

## References AHF

- [1] Adams K F, Fonarow G C, Emerman C L, et al. Characteristics and outcomes of patients hospitalized for heart failure in the United States: Rationale, design, and preliminary observations from the first 100,000 cases in the Acute Decompensated Heart Failure National Registry ADHERE. *Am Heart J* 2010;160: 885-92. [doi.org/10.1016/j.ahj.2004.08.005](https://doi.org/10.1016/j.ahj.2004.08.005) *ClinicalTrials.gov Identifier: NCT00366639. Status: Completed.*
- [2] Hauptman PJ, Goodlin SJ, Lopatin M, et al. Characteristics of patients hospitalized with acute decompensated heart failure who are referred for hospice care. *Arch Intern Med.* 2007 Oct 8; 167(18):1990-7 *ClinicalTrials.gov Identifier: NCT00366639. Status: Completed.*
- [3] Logeart D, Isnard R, Resche-Rigon R. et al. Current aspects of the spectrum of acute heart failure syndromes in a real-life setting: the OFICA study. *European Journal of Heart Failure* (2013) 15, 465–476. [doi:10.1093/eurjhf/hfs189](https://doi.org/10.1093/eurjhf/hfs189) *ClinicalTrials.gov Identifier: NCT01080937. Status: Completed.*
- [4] Zannad F, Mebazaa A, Juillière Y. et al. Clinical profile, contemporary management and one-year mortality in patients with severe acute heart failure syndromes: The EFICA study. *European Journal of Heart Failure* 8 (2006) 697 – 705. [doi:10.1016/j.ejheart.2006.01.001](https://doi.org/10.1016/j.ejheart.2006.01.001). *Status: Completed.*
- [5] Crespo-Leiro M, Anker S D, Maggioni A P., et al. European Society of Cardiology Heart Failure Long-Term Registry (ESC-HF-LT): 1-year follow-up outcomes and differences across regions. *European Journal of Heart Failure* (2016) 18, 613–625. [doi:10.1002/ejhf.566](https://doi.org/10.1002/ejhf.566). *Status Completed.*
- [6] Nieminen M S, Brutsaert D, Dickstein K et al. EuroHeart Failure Survey II (EHFS II): a survey on hospitalized acute heart failure patients: description of population. *European Heart Journal* (2006) 27, 2725–2736. [doi:10.1093/eurheartj/ehl332](https://doi.org/10.1093/eurheartj/ehl332)
- [7] Maggioni A P., Dahlström U, Filippatos G., et al. EURObservational Research Programme: The Heart Failure Pilot Survey (ESC-HF Pilot). *European Journal of Heart Failure* (2010) 12, 1076–1084. [doi:10.1093/eurjhf/hfq154](https://doi.org/10.1093/eurjhf/hfq154)
- [8] Adnet F, et al. Care Pathways of Acute Heart Failure Patients: Impact on In-hospital Mortality. *ClinicalTrials.gov Identifier: NCT03903198. Status: Completed.*
- [9] Sean P. Collins, et al. Determining When Patients Hospitalized With Acute Heart Failure Can Be Safely Sent Home: The DECIDE Study (DECIDE). *ClinicalTrials.gov Identifier: NCT00911703. Status: Completed.*
- [10] Juilliere Y, et al. Permanent Observatory of Heart Failure (ODIN) *ClinicalTrials.gov Identifier: NCT01091441 Status:Completed.*
- [11] Mike Osz, et al. Heart Failure Optimization Study (HF-Opt) *ClinicalTrials.gov Identifier: NCT03016754 Status: Recruiting.*
- [12] Spinar J, et al. Baseline characteristics and hospital mortality in the Acute Heart Failure Database (AHEAD) Main registry. *Critical Care* 2011, 15: R291. <http://ccforum.com/content/15/6/R291>
- [13] Chioncel O, Mebazaa A, Harjola V., et al. Clinical phenotypes and outcome of patients hospitalized for acute heart failure: the ESC Heart Failure Long-Term Registry. *European Journal of Heart Failure* (2017) 19, 1242–1254. [doi:10.1002/ejhf.890](https://doi.org/10.1002/ejhf.890)
- [14] Teixeira A, Parenica J, Park J, et al. Clinical presentation and outcome by age categories in acute heart failure: results from an international observational cohort. *European Journal of Heart Failure* (2015) 17, 1114–1123. [doi:10.1002/ejhf.330](https://doi.org/10.1002/ejhf.330)
- [15] Metra M, Mentz R J, Chiswell K et al. Acute heart failure in elderly patients: worse outcomes and differential utility of standard prognostic variables. Insights from the PROTECT trial. *Eur J Heart Fail* 2015;17:109–118. [doi:10.1002/ejhf.207](https://doi.org/10.1002/ejhf.207)
- [16] Mebazaa A, Gayat E, Lassus J, et al. GREAT Network. Association between elevated blood glucose and outcome in acute heart failure: results from an international observational cohort. *J Am Coll Cardiol* 2013; 61:820–829. [doi:10.1016/j.jacc.2012.11.054](https://doi.org/10.1016/j.jacc.2012.11.054)
- [17] Shah R, Gayat E, Januzzi JL Jr, et al. GREAT (Global Research on Acute Conditions Team) Network. Body mass index and mortality in acutely decompensated heart failure across the world: a global obesity paradox. *J Am Coll Cardiol* 2014; 63:778–785. [doi:10.1016/j.jacc.2013.09.072](https://doi.org/10.1016/j.jacc.2013.09.072)
- [18] Tavazzi L, Senni M, MD; Metra M, et al. Multicenter Prospective Observational Study on Acute and Chronic Heart Failure One-Year Follow-up Results of IN-HF (Italian Network on Heart Failure) Outcome Registry. *Circ Heart Fail.* 2013;6:473-481. [doi: 10.1161/circheartfailure.112.000161](https://doi.org/10.1161/circheartfailure.112.000161)
- [19] Desta L, Jernberg T, Spaak J, Hofman-Bang C, Persson H. Risk and predictors of readmission for heart failure following a myocardial infarction between 2004 and 2013: A Swedish nationwide observational study. <http://dx.doi.org/10.1016/j.ijcard.2017.05.086>
- [20] Carballo S. Prospective Registry of Acute Heart Failure. *ClinicalTrials.gov identifier: NCT02444416 Status: Recruiting.*
- [21] Nathalie Thilly. Epidemiology and Prognostic of the Acute Heart Failure (EPICAL2). *ClinicalTrials.gov identifier: NCT02880358 Status: Unknown.*
- [22] GSK Clinical Trials Organized Program to Initiate Lifesaving Treatment in Hospitalized Patients With Heart Failure (OPTIMIZE-HF). *ClinicalTrials.gov identifier: NCT00344513 Status: Completed.*
- [23] Follath F, Yilmaz M B, Delgado J.F, et al. Clinical presentation, management and outcomes in the Acute Heart Failure Global Survey of Standard Treatment (ALARM-HF). *Intensive Care Med* (2011) 37:619–626. [doi:10.1007/s00134-010-2113-0](https://doi.org/10.1007/s00134-010-2113-0)

## Important recent Acute Coronary Syndrome (ACS) cohorts

| Name                                                                                                                                      | Main Objective                                                                                                                                                                                                                                                                                                                      | Status                                      | Study type                                            | n & observation period | Participant characteristics                                               | Main Outcome                                     | Acute Phenotyping                                                                                                                                                                                                                                           | Follow up                                                              |
|-------------------------------------------------------------------------------------------------------------------------------------------|-------------------------------------------------------------------------------------------------------------------------------------------------------------------------------------------------------------------------------------------------------------------------------------------------------------------------------------|---------------------------------------------|-------------------------------------------------------|------------------------|---------------------------------------------------------------------------|--------------------------------------------------|-------------------------------------------------------------------------------------------------------------------------------------------------------------------------------------------------------------------------------------------------------------|------------------------------------------------------------------------|
| A Chinese Registry to Determine the Genetics Risk Factors and Serum Biomarkers for Acute Coronary Syndrome (ARSGB-ACS)<br><br>NCT03752515 | to determine genetics risk factors and serial biomarkers of Acute Coronary Syndrome                                                                                                                                                                                                                                                 | Recruiting (June 2015 – Oct 2020)           | multi-center (China) prospective observational cohort | n=2000<br>3 years      | adults hospitalized for ACS within 48hrs after symptom onset              | MACE                                             | <u>within 1 month after recruitment</u><br><br>Demography, Anthropometry, History, lifestyle<br><br><u>within 3 months after recruitment</u><br><br>Bio-sampling for exon sequencing, metabolic profile (Mass Spectrometry, detection of miRNAs expression) | <u>3+ 6 months, 1+2+3 years</u><br><br>MACE                            |
| Biomarkers in Acute Cardiac Care (BACC)<br><br>NCT02355457                                                                                | to detect and evaluate new cardiac biomarkers, evaluate and improve ACS risk scores taking into account clinical, gender specific, psycho-social and lifestyle-risk factors, protein patterns and genetic variability in addition to the classical risk factors with respect to the primary endpoint of acute myocardial infarction | Recruiting (July 2013- Dec 2021)            | monocentric (UKE, Hamburg, Germany)                   | n= 3000<br>4 years     | Adults with suspected myocardial infarction who present to the ER         | Acute myocardial infarction (AMI) as index event | Clinical data and History<br><br>Blood sampling (DNA/RAN, cells for genetic, gene expression and proteomic studies)                                                                                                                                         | <u>1 + 5 month, 2+4 years</u><br><br>AMI, mortality, heart failure QoL |
| French Registry of Acute ST-elevation or Non-ST-elevation Myocardial Infarction 2015 (FASTMI2015)                                         | to identify patients at risk for increased morbidity and mortality after myocardial infarction and could be the basis for the subsequent                                                                                                                                                                                            | Active, not recruiting (Oct 2015- Oct 2027) | multicenter (France) prospective observational cohort | n= 5000<br>10 yrs      | Adults admitted to an coronary ICU for AMI within 48h after symptom onset | All-cause mortality 1 year after hospitalization | Bio-sampling (genetic, serologic, fecal)                                                                                                                                                                                                                    | <u>Annually up to 10 years</u><br><br>Mortality                        |

|                                                                                                |                                                                                                                                             |                                 |                                                                                      |                                  |                                                                                                                                                           |                                                                    |                                                                         |                                                                                                                                       |
|------------------------------------------------------------------------------------------------|---------------------------------------------------------------------------------------------------------------------------------------------|---------------------------------|--------------------------------------------------------------------------------------|----------------------------------|-----------------------------------------------------------------------------------------------------------------------------------------------------------|--------------------------------------------------------------------|-------------------------------------------------------------------------|---------------------------------------------------------------------------------------------------------------------------------------|
| NCT02566200                                                                                    | realization of specific studies on the optimal therapeutic management of the disease according to the different risk profiles               |                                 |                                                                                      |                                  |                                                                                                                                                           |                                                                    |                                                                         |                                                                                                                                       |
| Observational Registry on Acute Coronary Syndromes in Campania (Campania RESCA)<br>NCT02650323 | to collect data related to management of patients affected by acute coronary syndromes and hospitalized in the Campania Region of Italy     | Unknown (march 2016-March 2018) | Monocentric (Federico II University, Naples, Italy) prospective observational cohort | n= 10000<br>1 year               | Adults hospitalized for ACS                                                                                                                               | 1 year survival rate                                               | <i>not specified (registry)</i>                                         | <i>not specified</i>                                                                                                                  |
| Registry of Acute Coronary Syndromes in the Lazio Region of Italy (NET-SCA)<br>NCT01216462     | to document and evaluate the current presentation and clinical management of Acute Coronary Syndromes (ACS) in in the Lazio region of Italy | Unknown (Jan 2010-Dec 2018)     | Multi-center (Lazio, Italy) prospective observational cohort                         | n= 3000<br>1 year                | All adults hospitalized to CCU in 15 Lazio hospitals                                                                                                      | 1 year mortality                                                   | <i>not specified (registry)</i>                                         | <u>1 year</u><br>Mortality<br>Hospitalization for ACS, AHF or coronary revascularization                                              |
| Karolinska Cardiorenal Theme-centre and Stockholm Heartbank (KKT)<br>NCT01204645               | to explore the cardiorenal syndrome and provide improved care for the individual patient                                                    | Recruiting (May 2010-Jan 2024)  | Multi-center (Sweden) prospective observational cohort                               | n= 10.000<br>5 years             | 3 groups of pts:<br>• while hospitalized for ACS<br>• delayed inclusion at 6/12 months FU after ACS<br>• while admitted for elective coronary angiography | Combined primary endpoint (death, new cardiovasc. event, dialysis) | Clinical data and History<br>Blood sampling<br>Biobanking (DNA, plasma) | <u>1 year</u><br>Vascular function (arterial stiffness, microcirculation by laser-doppler)<br><u>5 year</u><br>renal function decline |
| The LADIES Acute Coronary Syndromes Study (Ladies ACS)<br>NCT01997307                          | to investigate the relation between age at menopause and severity of coronary artery disease in menopausal women                            | Completed (April 2014-Oct 2015) | Monocentric (Italy) prospective observational case-control                           | n= 675<br>no follow up scheduled | pts. > 55 years with ACS undergoing coronary angiography; women and men                                                                                   | the severity of coronary artery disease, as appraised by the       | Clinical data and History (incl. fertility and menopause)               | none                                                                                                                                  |



|                                                                                                                          |                                                                                                                                                                                                                                                                                                                                |                                  |                                                                             |                         |                                                            |                                                                                                                                                                                |                                                                                                                                                                                                                                                             |                                                                                      |
|--------------------------------------------------------------------------------------------------------------------------|--------------------------------------------------------------------------------------------------------------------------------------------------------------------------------------------------------------------------------------------------------------------------------------------------------------------------------|----------------------------------|-----------------------------------------------------------------------------|-------------------------|------------------------------------------------------------|--------------------------------------------------------------------------------------------------------------------------------------------------------------------------------|-------------------------------------------------------------------------------------------------------------------------------------------------------------------------------------------------------------------------------------------------------------|--------------------------------------------------------------------------------------|
|                                                                                                                          | with acute coronary syndromes and clinical indication to coronary angiography                                                                                                                                                                                                                                                  |                                  |                                                                             |                         | are enrolled in a 2:1 ratio and stratified to 4 age groups | Gensini score within 1 day                                                                                                                                                     | Gensini and SYNTAX score to evaluate extent of coronary artery disease                                                                                                                                                                                      |                                                                                      |
| A Study to Improve Cardiovascular Outcomes in High Risk Patients With Acute Coronary Syndrome (ICON1)<br><br>NCT01933581 | to develop a risk score that will inform physicians of the patient's future risk of developing adverse events and provide a better understanding of how to manage older patients with coronary artery disease and also help plan future studies looking at treatment strategies that might be beneficial in improving outcomes | Completed (Oct 2016-Dec 2016)    | Monocentric (Newcastle, UK) prospective observational cohort                | n= 300<br><br>1 year    | Pts > 64 yrs admitted with ACS for coronary angiography    | occurrence of one or more of death, myocardial infarction, stroke, repeat revascularisation, Bleeding Academic Research Consortium (BARC) defined bleeding (follow-up: 1 YEAR) | Bio-sampling/DNA<br><br>QoL                                                                                                                                                                                                                                 | <u>1 year</u><br><br>Primary outcome<br><br>QoL                                      |
| Prospective Registry of Acute Coronary Syndromes in Ferrara (ARYOSTO)<br><br>NCT02438085                                 | to describe the clinical epidemiology and the current management of acute coronary syndromes (ACS) in the area of Ferrara, Italy                                                                                                                                                                                               | Recruiting (June 2014-June 2020) | Monocentric (University of Ferrara, Italy) prospective observational cohort | n= 5000<br><br>5 years  | Adults admitted to hospital for ACS                        | 1-year occurrence of cardiac death, myocardial infarction, or cerebrovascular accident                                                                                         | Clinical data and History<br><br>Acute clinical course<br><br>Bio-sampling (inflammatory, endothelial, Thrombotic function biomarkers)<br><br>Plaque morphology in subgroups with comorbidities (diabetes, COPD, CKD, malignancy) vs. no such comorbidities | <u>Annually up to 5 years</u><br><br>"Clinical FU"<br><br>Clinical events<br><br>QoL |
| International Survey of Acute Coronary                                                                                   | (1) documentation of the characteristics of all patients presenting                                                                                                                                                                                                                                                            | Recruiting (Sep 2010-Dec 2022)   | Multi-center, international (Europe)                                        | n= 24.000<br><br>1 year | Adults admitted for ACS                                    | All-cause mortality                                                                                                                                                            | Clinical data and History                                                                                                                                                                                                                                   | <u>30 days, 6 months, 1 year</u>                                                     |

|                                                                                |                                                                                                                                                                                                                                                                                                                                                                                                                                                                               |                                   |                                                                    |                              |                                                                                                                                |                                                                                               |                                                                               |                                                                                                                                                                                                                                         |
|--------------------------------------------------------------------------------|-------------------------------------------------------------------------------------------------------------------------------------------------------------------------------------------------------------------------------------------------------------------------------------------------------------------------------------------------------------------------------------------------------------------------------------------------------------------------------|-----------------------------------|--------------------------------------------------------------------|------------------------------|--------------------------------------------------------------------------------------------------------------------------------|-----------------------------------------------------------------------------------------------|-------------------------------------------------------------------------------|-----------------------------------------------------------------------------------------------------------------------------------------------------------------------------------------------------------------------------------------|
| <p>Syndromes in Transitional Countries (ISACS-TC)</p> <p>NCT01218776</p>       | <p>to the ISACS-TC centers with STEMI or NSTEMI (2) documentation of in-hospital outcome, and outcome rates at 6 month and 1 year, (3) documentation of invasive procedures and procedure-associated complications (4) documentation of therapeutic regimens and investigation conformity of treatment with already established guidelines.</p>                                                                                                                               |                                   | <p>prospective observational cohort</p>                            |                              |                                                                                                                                |                                                                                               | <p>Bio-sampling for pharmacokinetic/genetic studies</p>                       | <p>Clinical outcome (mortality, recurrent ACS, cardiovascular mortality)</p> <p>Adherence to internationally guideline recommended therapies</p> <p><u>6 months, 1 year</u></p> <p>Bio-sampling for pharmacokinetic/genetic studies</p> |
| <p>Inflammation and Acute Coronary Syndromes (SPUM-ACS)</p> <p>NCT01000701</p> | <p><u>Subprojects (examples)</u></p> <p>1 Discover novel genomic biomarkers of ACS in leukocyte subsets by means of analyzing gene expression profiles and function</p> <p>2 Evaluate novel diagnostic and prognostic biomarkers in soluble form in blood/plasma and urine</p> <p>3 Visualize the vulnerable plaque using intravascular ultrasound/optical coherence tomography (IVUS/OCT) and correlate with outcome and biomarkers</p> <p>4 Characterize the effects of</p> | <p>Unknown (Oct 2009-Jan2019)</p> | <p>Multi-center (Switzerland) prospective observational cohort</p> | <p>n= 4000</p> <p>1 year</p> | <p>Adults presenting with ACS and 2 control groups (stable CAD, healthy controls, peripheral artery occlusive disease pts)</p> | <p>composite of cardiac death, myocardial infarction or ischemia-driven revascularization</p> | <p>Clinical data and History</p> <p>Bio-sampling (genetics, inflammation)</p> | <p><u>1 year</u></p> <p>Composite endpoint</p> <p>Subgroups: Bio-sampling (temporal change in biomarkers)</p> <p>STEMI subgroup: IVUS/OCT (plaque burden)</p>                                                                           |

|  |                                                                                                                             |  |  |  |  |  |  |  |
|--|-----------------------------------------------------------------------------------------------------------------------------|--|--|--|--|--|--|--|
|  | inflammation on progenitor/stem cell-mediated repair after ACS by means of analyzing gene expression profiles and function. |  |  |  |  |  |  |  |
|--|-----------------------------------------------------------------------------------------------------------------------------|--|--|--|--|--|--|--|

### Important recent Stroke cohorts

| Name                                                                                                                       | Main Objective                                                                                           | Status                           | Study type                                                                                     | N<br>Follow up (FU)                 | Participant characteristics                                                                                      | Main Outcome                                                               | Acute Phenotyping                                                                                                                                                         | Follow up Phenotyping                                                                                                                                                  |
|----------------------------------------------------------------------------------------------------------------------------|----------------------------------------------------------------------------------------------------------|----------------------------------|------------------------------------------------------------------------------------------------|-------------------------------------|------------------------------------------------------------------------------------------------------------------|----------------------------------------------------------------------------|---------------------------------------------------------------------------------------------------------------------------------------------------------------------------|------------------------------------------------------------------------------------------------------------------------------------------------------------------------|
| coHort to Identify Biological and Imaging markerS of Cardiovascular Outcomes in STROKE (HIBISCUSSTROKE)<br><br>NCT03149705 | to identify new markers: biological and imaging, treatment response and prognosis after ischemic stroke. | Recruiting (Oct 2016 – Oct 2026) | monocentric (Lyon, France) prospective observational cohort                                    | n=300 stroke pts.<br>FU: 5 years    | adults with MRI confirmed stroke and proximal artery occlusion eligible for revascularization                    | mRS Score                                                                  | <ul style="list-style-type: none"> <li>Blood samples/DNA</li> <li>MRI infarct size + hemorrhagic transformation</li> </ul>                                                | <u>3 months</u><br>Blood samples/DNA<br><u>up to 5 yrs</u><br>mRS, NIHSS, QoL questionnaire                                                                            |
| <b>PROSpective Cohort with Incident Stroke (PROSCIS)</b><br>[1]<br><br>NCT01364168                                         | to derive and validate risk scores for vascular endpoints and death following an incident stroke.        | Recruiting (Feb 2011 – Dec 2026) | multi-center (LMU Munich and <b>Charité Berlin</b> , Germany) prospective observational cohort | n= 850 stroke pts.<br>FU: 36 months | adults within maximum of 7 days after acute first ever ischemic or hemorrhagic stroke or venous sinus thrombosis | Composite Primary Endpoint (stroke, myocardial infraction, vascular death) | Clinical data and History<br><br>Pain questionnaire, anthropometry, blood pressure NIHSS, mRS, Barthel, MOCA, MMST, ABI, MRI/CT, ECG, TTE,<br><br>Blood sampling/ DNA/RNA | <u>3/12/24/36 months</u><br><br>Living situation, lifestyle factors, pain questionnaire, medication, mRS, Barthel, cognitive status (TICS-M), depression scale (CES-D) |

|                                                                                                                                          |                                                                                                                                                                                                      |                                            |                                                                                                         |                                   |                                                                                                                                          |                                                                                                      |                                                                                                                |                                                                                                                                                                   |
|------------------------------------------------------------------------------------------------------------------------------------------|------------------------------------------------------------------------------------------------------------------------------------------------------------------------------------------------------|--------------------------------------------|---------------------------------------------------------------------------------------------------------|-----------------------------------|------------------------------------------------------------------------------------------------------------------------------------------|------------------------------------------------------------------------------------------------------|----------------------------------------------------------------------------------------------------------------|-------------------------------------------------------------------------------------------------------------------------------------------------------------------|
| Cohort for Severe Ischemic Stroke (SIS)<br><br>NCT03222024                                                                               | to investigate causes, risk factors, clinical course, management and outcomes of severe ischaemic stroke in a real-world setting                                                                     | Recruiting (2017- ?)                       | multi-center (Western China) prospective observational cohort                                           | n= 2500 stroke pts.<br>FU: 1 year | adults within a max. of 30 days after acute ischemic stroke of all severities                                                            | mRS after 3 months                                                                                   | Clinical data and History, acute clinical course<br><br>mRS, Barthel, MRI/CT<br><br>Blood sampling/<br>DNA/RNA | <u>3 months &amp; 1 year</u><br><br>Clinical outcome                                                                                                              |
| The Natural History of Blood-Brain Barrier (BBB) Disruption in Stroke Patients With White Matter Hyperintensities [2]<br><br>NCT03366129 | to follow a cohort of stroke patients with white matter hyperintensities (WMH), using MRI .. to identify BBB permeability on MRI as a biomarker for disease pathogenesis, activity, and progression. | Recruiting (Sep 2018-Jan 2034)             | Multi-center (Columbia and Maryland, USA) prospective observational cohort                              | n=310 stroke pts<br>FU: 6years    | adults with clinical stroke or TIA symptoms admitted to NIH stroke service who have confluent white matter hyperintensities (WMH) on MRI | relationship between the presence of BBB disruption in the NAWM and the progression of WMH over time | MRI                                                                                                            | <u>Every three months first year, every 6 month second year, annually till 6 years post inclusion</u><br><br>MRI<br><br>Cognitive/clinical scaling<br><br>History |
| Biomarker Signature of Stroke Aetiology Study: The BIOSIGNAL-Study<br><br>NCT02274727                                                    | to prospectively evaluate the predictive value of the most promising blood biomarkers to identify treatable stroke etiologies on admission and risk of recurrence                                    | Active, not recruiting (Sep 2014-Oct 2018) | Multi-center, international (Switzerland, USA, Germany, Greece, Spain) prospective observational cohort | n=3000<br>FU: 1 year              | adults with stroke symptoms who had consistent brain imaging within a max. of 24h after onset                                            | recurrent stroke, including fatal stroke                                                             | MRI<br>Duplex sonography<br>ECG<br><br>Blood samples                                                           | <u>3 months + 1 year</u><br><br>MRI<br>Duplex sonography<br>ECG<br><br>Blood samples                                                                              |
| Characterization of Clinical, Biological, Morphological and Pharmacological Factors Influencing Occurrence of                            | to determine the clinical, biological, lesional and pharmacological factors associated with post-stroke                                                                                              | Recruiting (Feb 2010-Dec 2023)             | multi-center (France) prospective observational cohort                                                  | N=1100<br>FU: 5 years             | Pts. > 40-95 years within 72hrs after acute hemispheric or hemorrhagic                                                                   | dementia occurrence at 5 years                                                                       | MRI<br>Blood samples<br>History<br>life style                                                                  | <u>6 months/ 1year/ 3 years/ 5 years</u><br><br>MRI<br>Cognitive testing<br>Clinical exam                                                                         |

|                                                                                                                                                 |  |                                                                                                                                                                                        |                                              |                                                                        |                                 |                                                                                                           |                                                                                                                                                      |                  |                                                                                                                                                                                                                                                                                                                                      |
|-------------------------------------------------------------------------------------------------------------------------------------------------|--|----------------------------------------------------------------------------------------------------------------------------------------------------------------------------------------|----------------------------------------------|------------------------------------------------------------------------|---------------------------------|-----------------------------------------------------------------------------------------------------------|------------------------------------------------------------------------------------------------------------------------------------------------------|------------------|--------------------------------------------------------------------------------------------------------------------------------------------------------------------------------------------------------------------------------------------------------------------------------------------------------------------------------------|
| Dementia or Cognitive Disorders After Stroke (strokedem) [3]<br><br>NCT01330160                                                                 |  | dementia by the long-term follow-up of a stroke patient cohort                                                                                                                         |                                              |                                                                        |                                 | stroke without dementia                                                                                   |                                                                                                                                                      |                  | Activities of daily life                                                                                                                                                                                                                                                                                                             |
| Evaluation of Clinical and Imaging Criteria, and Plasma Biomarkers of Patients Receiving an Endovascular Treatment for an Acute Ischemic Stroke |  | Study like register with biomarkers samples for patient experiencing acute ischemic stroke, to assess clinical outcomes and different factors that may affect the clinical outcomes    | Recruiting (June 2018-Dec 2022)              | multi-center (France) observational (registry) cohort                  | N= 4000 stroke pts. FU: 3 month | mRS at 3 months                                                                                           | adults with imaging confirmed acute ischemic stroke with large artery occlusion who received thrombectomy                                            | Blood sample MRI | mRS, clinical evaluation (telephone interview)                                                                                                                                                                                                                                                                                       |
| Cognition and Affect After Stroke: a Prospective Evaluation of Risks (CASPAR)<br><br>NCT02585349                                                |  | primary objectives are to identify biomarker-based predictors of post-stroke depression (PSD), post-stroke apathy (PSA), vascular cognitive impairment (VCI), and post-stroke dementia | Active, not recruiting (June 2013- Dec 2018) | monocentric (Maastricht, Netherlands) prospective observational cohort | N= 250 FU: 3 years              | Vascular Cognitive Impairment; Post-Stroke Depression; Post Stroke Spathy at 1 year (3 years added later) | adults > 40 yrs with first ever ischemic or hemorrhagic stroke or recurrent stroke if interval to previous stroke is at least 3 yrs with no sequelae | none             | <u>Baseline: 10-12 weeks post stroke</u><br><u>FU: 6 month, 1 year, 3 years after baseline</u><br>Blood sample for DNA (ApoE, CLU, PICALM, CR1, ACE, MTHFR) and RNA-Extraction and subsequent analysis of expression of inflammatory and stroke-related genes at the mRNA level<br>Cognition<br>Depression, apathy<br>QoL<br>Barthel |

|                                                                                      |  |                                                                                                                                                                                                            |                                                |                                                                                                                                |                                                               |                                                                |                                                                                                         |                                                                                                                                                                                                                                                                                                         |                                                                                                                                                             |
|--------------------------------------------------------------------------------------|--|------------------------------------------------------------------------------------------------------------------------------------------------------------------------------------------------------------|------------------------------------------------|--------------------------------------------------------------------------------------------------------------------------------|---------------------------------------------------------------|----------------------------------------------------------------|---------------------------------------------------------------------------------------------------------|---------------------------------------------------------------------------------------------------------------------------------------------------------------------------------------------------------------------------------------------------------------------------------------------------------|-------------------------------------------------------------------------------------------------------------------------------------------------------------|
| Cytokine Registry Database of Stroke (Ischemic and Hemorrhagic) Patients (CRISP)     |  | creating a database of acute stroke patients containing all pertinent medical demographics and clinical information along with the laboratory data, molecular levels of pertinent cytokines/neural factors | Active, not recruiting (May 2019-Dec 2020)     | Monocentric (Albuquerque, USA)<br>Prospective observational cohort                                                             | N= 600 stroke pts. vs. patients without stroke<br>FU: 3 years | change of cytokine levels within 24h in the acute stroke phase | Adults within 24h of onset of acute ischemic or hemorrhagic stroke                                      | <u>on admission and 24h later</u><br>Serum and Urine measurement of cytokines (serum interleukin-33, IL-37, IL-36, IL-4, IL-6, IL-10, IL-17, IL-23, IL-1, TNF, PDGF, VEGFM TNFa, ANNULIN, MMP-9, MMP-12, NFk-B levels plus metabolic products like MPO, etc and glial factors like GMF, SIO00B, GM6001) | follow up for 3 years (not further defined)                                                                                                                 |
| <b>Determinants of Dementia After Stroke (DEDEMAS)</b><br><br>[4]<br><br>NCT01334749 |  | to identify predictors of post stroke dementia (PSD) with a particular focus on biological markers (neuroimaging and biochemical) and on interactions between vascular and neurodegenerative mechanisms    | Recruiting (April 2011-August 2028)            | Multi-center (DZNE at Munich, <b>Charité Berlin</b> , Bonn, Göttingen, Magdeburg, Germany)<br>Prospective Observational Cohort | n= 600<br><br>5 years                                         | Dementia occurrence at 5 and 10 years                          | Adults without dementia but with acute ischemic or hemorrhagic stroke within 72hrs confirmed by imaging | Clinical exam<br>Waist-Hip-Ratio<br>Ankle-Brachial-Index<br>MRI<br>Retinal Imaging<br>Intima-Media-Thickness<br>Blood samples<br>Cognitive Testing                                                                                                                                                      | <u>6 month &amp; 1,2,3, ,5 years</u><br>MRI<br><br><u>In pts. developing cognitive impairment</u><br>FDG-PET<br>Amyloid-PET<br>CSF samples                  |
| Norwegian Cognitive Impairment After Stroke Study (NorCOAST) [8]<br><br>NCT02650531  |  | to quantify and measure levels of cognitive impairments in a general Norwegian stroke population and to identify biological and clinical markers associated with prognosis for                             | Active, not recruiting (May 2015-October 2019) | Multi-center (Norway)<br>Prospective Observational Cohort                                                                      | n= 816<br><br>1,5 years                                       | Cognitive outcome                                              | Adults with acute ischemic or hemorrhagic stroke according to WHO criteria within 7 days after onset    | Brain MRI<br>Blood sampling<br>Biobanking (genetics, inflammation)<br>Clinical data and History<br>NIHSS<br>mRS<br>Cognition<br>Physical activity<br>QoL                                                                                                                                                | <u>3 months + 1,5 and 3</u> Brain MRI<br>Blood sampling<br>Biobanking<br>Clinical data and History<br>NIHSS<br>mRS<br>Cognition<br>Physical activity<br>QoL |

|                                                                                                                                                                                                                               |  |                                                                                                                                                                                                                                |                                      |                                                                              |                        |                                                          |                                                                                                                                                                                   |                                                                                                         |                                                                                                                                                                                                                             |
|-------------------------------------------------------------------------------------------------------------------------------------------------------------------------------------------------------------------------------|--|--------------------------------------------------------------------------------------------------------------------------------------------------------------------------------------------------------------------------------|--------------------------------------|------------------------------------------------------------------------------|------------------------|----------------------------------------------------------|-----------------------------------------------------------------------------------------------------------------------------------------------------------------------------------|---------------------------------------------------------------------------------------------------------|-----------------------------------------------------------------------------------------------------------------------------------------------------------------------------------------------------------------------------|
|                                                                                                                                                                                                                               |  | cognitive disorders following incident stroke                                                                                                                                                                                  |                                      |                                                                              |                        |                                                          |                                                                                                                                                                                   |                                                                                                         |                                                                                                                                                                                                                             |
| Genetic, Metabolic, and Growth Factor Repository for Cerebrovascular Disorders                                                                                                                                                |  | the maintenance and utilization of a repository of samples from patients with cerebrovascular disease and stroke                                                                                                               | Recruiting (sep 2016-Sep 2021)       | Monocentric (Cedars-Sinai Medical Center, USA) prospective observational     | N= 900<br>FU: 6 months | Change in mRS, NIHSS, Barthel-Index and MOCA             | Adults diagnosed with cerebrovascular disease (ischemic stroke, aneurysms, moyamoya disease, arteriovenous malformation, hemorrhagic stroke and surgically treated patients)      | Blood samples/ DNA<br>CSF<br>Micodialysis<br>Angiography (DSA)                                          | <u>1, 3 and 6 months:</u><br>Functional (mRS, Barthel), clinical stroke specific (NIHSS) and cognitive (MOCA) outcome<br>Blood sample / DNA<br>Microdialysis sample<br>CSF<br><br><u>6 months</u><br>Angiography (DSA)      |
| Intracerebral Hemorrhage Due to Oral Anticoagulants in the Secondary Prevention of Ischemic Stroke: Prediction of the Risk by the Detection of Leukoaraiosis and Microbleeding With Magnetic Resonance [5]<br><br>NCT02238470 |  | to evaluate whether Magnetic Resonance (MR) helps in predicting the risk of Intracranial Hemorrhage (ICH-OA) in patients with ischemic stroke who will receive Oral Anticoagulants (OA) for the secondary prevention of stroke | Completed (April 2012 Sep 2017)      | Multi-center, international (Italy, France) prospective observational cohort | N= 937<br>FU: 2 years  | Intracranial hemorrhage (every three months until 1 yrs) | Pts older than 64 yrs within acute phase of ischemic stroke or TIA who were not before but will then receive oral anticoagulants for secondary prevention of cardioembolic stroke | history<br>mRS                                                                                          | <u>Within 1 month after stroke:</u><br>MRI for detection and quantification of leucariosis (FAZEKAS Scale) and microbleedings ( BOMBS scale)<br><br><u>Every 3 months till 1year</u><br>Clinical events<br>Treatment change |
| Cerebral microbleeds (CMBs) and intracranial hemorrhage in pts                                                                                                                                                                |  | to establish the value of CMBs and genetic factors in predicting symptomatic ICH following best                                                                                                                                | Completed (August 2011-October 2017) | Multicenter, international (United Kingdom, Netherlands)                     | N= 1490<br>FU: 2 yrs   | symptomatic intracranial hemorrhage within 2 years       | Adults with ECG-confirmed non-valvular AF and indication for anticoagulation                                                                                                      | MRI (including Fazekas scale and MARS-Scale for microbleeds) performed before or a max. of 1 week after | <u>5 monthsh, 1 year, 2years</u><br>Clinical events                                                                                                                                                                         |

|                                                                                            |  |                                                                                                                                                                                                                                                           |                                    |                                                                            |                                     |                                                                                                                                                                       |                                                                                                                                                                                                                                                                                     |                                                                                                                                                                                                                                       |                                                                                                   |
|--------------------------------------------------------------------------------------------|--|-----------------------------------------------------------------------------------------------------------------------------------------------------------------------------------------------------------------------------------------------------------|------------------------------------|----------------------------------------------------------------------------|-------------------------------------|-----------------------------------------------------------------------------------------------------------------------------------------------------------------------|-------------------------------------------------------------------------------------------------------------------------------------------------------------------------------------------------------------------------------------------------------------------------------------|---------------------------------------------------------------------------------------------------------------------------------------------------------------------------------------------------------------------------------------|---------------------------------------------------------------------------------------------------|
| Anticoagulated for AF after stroke or TIA (CROMIS-2) [6]<br>NCT02513316                    |  | practice oral anticoagulation to prevent recurrent ischaemic stroke due to AF                                                                                                                                                                             |                                    |                                                                            |                                     |                                                                                                                                                                       | by treating physician who were admitted to one of the participating hospitals due to ischemic stroke or TIA                                                                                                                                                                         | initiation of anticoagulation                                                                                                                                                                                                         |                                                                                                   |
| <b>Cardiomyocyte Injury following Stroke (CORONA-IS)</b> [7]<br><br>NCT03892226            |  | to characterize stroke-associated acute myocardial injury (elevated hs-cardiac troponin) using different diagnostic examinations in order get a better understanding of it's underlying pathomechanisms                                                   | Recruiting (April 2019-March 2023) | Monocentric (Charité, Berlin, Germany)<br>Prospective observational cohort | N= 300<br><br>5 days post admission | Adults with MRI (DWI_)-confirmed acute ischemic stroke within 48hrs after onset, who received repeated measurement of high sensitivity Troponin T (cTn) within 24 hrs | Rate of myocardial edema, fibrosis and left ventricular dysfunction in MRI within five days after admission; rate of acute disturbance of microcirculation in MRI on the 4 <sup>th</sup> /5 <sup>th</sup> day after stroke onset; rate of impaired left ventricular function in TTE | Bio-sampling (Biobanking, microRNA)<br><br>Cardiac MRI<br><br>serial TTE<br><br>20 minute Holter ECG with cardiac autonomic markers                                                                                                   |                                                                                                   |
| <b>Heart and Brain Interfaces in Acute Ischemic Stroke (HEBRAS)</b> [8]<br><br>NCT02142413 |  | to investigate whether an enhanced diagnostic MRI work-up duration leads to a significant increase in relevant pathologic findings with respect to stroke aetiology as compared to the findings obtained by a routine diagnostic work-up in patients with | Completed (May 2014-March 2018)    | Monocentric (Charité, Berlin)<br>Prospective Observational cohort          | N= 368<br>FU: 1 year                | Adults within 2 days since onset of acute ischemic stroke confirmed by imaging without history or baseline-ECG-evidence of atrial fibrillation                        | Detection rate of findings relevant stroke etiology detected by enhanced diagnostic workup (up to 5 days post stroke) in comparison to findings obtained by clinical routine                                                                                                        | <u>Enhanced work up up to 5 days post stroke onset</u><br><br>Cardiac MRI<br><br>MR-angiography brain supplying arteries<br><br>Prolonged Holter –ECG up to 5 days<br><br>Heart rate variability<br><br>Urinary norepinephrine levels | <u>1 year</u><br><br>mRS<br>clinical outcome: Mortality, Recurrent stroke , myocardial infarction |



|                                                                                                  |  |                                                                                                                                                                                                                                                                               |                                |                                                                                |                                                                                                                                                               |                                                                                                                                                                                                     |                                                                                                                                |                                                                                                                                                                                                   |                                                                                                                                       |
|--------------------------------------------------------------------------------------------------|--|-------------------------------------------------------------------------------------------------------------------------------------------------------------------------------------------------------------------------------------------------------------------------------|--------------------------------|--------------------------------------------------------------------------------|---------------------------------------------------------------------------------------------------------------------------------------------------------------|-----------------------------------------------------------------------------------------------------------------------------------------------------------------------------------------------------|--------------------------------------------------------------------------------------------------------------------------------|---------------------------------------------------------------------------------------------------------------------------------------------------------------------------------------------------|---------------------------------------------------------------------------------------------------------------------------------------|
|                                                                                                  |  | acute ischemic stroke                                                                                                                                                                                                                                                         |                                |                                                                                |                                                                                                                                                               |                                                                                                                                                                                                     | diagnostic workup*<br>* (stroke unit monitoring, echocardiography, duplex ultrasound brain-supplying arteries, 24h-Holter-ECG) | Troponin T serum levels                                                                                                                                                                           |                                                                                                                                       |
| International PFO Consortium                                                                     |  | to compare the risk of recurrent stroke and TIA in patients with patent foramen ovale (PFO) and otherwise unexplained stroke who undergo percutaneous device closure (PDC) or receive antithrombotic treatment (ATT)                                                          | Recruiting (Dec 2018-Dec 2021) | Multi-center, international (Switzerland, Germany, Belgium, USA, Spain, Italy) | n = 1500<br>FU: 3 years                                                                                                                                       | Proportion of pts free of any stroke (including fatal stroke) or TIA within 2 years                                                                                                                 | Adults with TEE confirmed PFO and stroke or TIA within 6 months of stroke onset                                                | none                                                                                                                                                                                              | Outcome after 3 years                                                                                                                 |
| Levels of Inflammatory Markers in Treatment of Stroke Study (LIMITS) [11, 12]<br><br>NCT00579306 |  | to determine if serum levels of inflammatory markers—such as hsCRP, serum amyloid A (SAA), CD40 ligand (CD40L), and monocyte chemoattractant protein-1 (MCP-1)—predict recurrent stroke and other vascular events among people with a history of small artery ischemic stroke | Completed (Feb 2005-July 2012) | multi-center (USA) prospective observational cohort                            | n= 1244<br>nested in participants of the phase III interventional Secondary Prevention of Small subcortical Stroke (SPS3) trial (n= 3020)<br><br>up to 5years | Pts. > 30 yrs with MRI proven typical lacunar stroke who presented with typical clinical lacunar syndromes within d months prior to inclusion; exclusion of macrovascular or cardioembolic etiology | Recurrent stroke                                                                                                               | <u>Baseline was not generally restricted to the acute phase (max. 6 months post stroke)</u><br>Demographics and Risk factor history<br><br>Bio-sampling (inflammatory markers, he primary stroke) | <u>1 year</u> Bio-sampling (ingflammatory markers)<br><br><u>up to 5 years</u> clinical outcome (recurrent stroke, cognitive decline) |

|                                                                                                                                                               |  |                                                                                                                                                                                                                                                                                    |                                                    |                                                                                   |                                                                                                                   |                                                                                                                                                                                                                                                                                                                                                                  |                                                                                                                                                      |                                                                                                                                                                                                                                                                                                                                                |                                                                                                                                      |
|---------------------------------------------------------------------------------------------------------------------------------------------------------------|--|------------------------------------------------------------------------------------------------------------------------------------------------------------------------------------------------------------------------------------------------------------------------------------|----------------------------------------------------|-----------------------------------------------------------------------------------|-------------------------------------------------------------------------------------------------------------------|------------------------------------------------------------------------------------------------------------------------------------------------------------------------------------------------------------------------------------------------------------------------------------------------------------------------------------------------------------------|------------------------------------------------------------------------------------------------------------------------------------------------------|------------------------------------------------------------------------------------------------------------------------------------------------------------------------------------------------------------------------------------------------------------------------------------------------------------------------------------------------|--------------------------------------------------------------------------------------------------------------------------------------|
| <p>A Study of the Relationship of Gut Microbial Composition and Stroke Outcome (GEMSTONE)</p> <p>NCT03470506</p>                                              |  | <p>to investigate the relationship between gut microbial composition and stroke outcome</p>                                                                                                                                                                                        | <p>Active, not recruiting (Dec 2017-July 2022)</p> | <p>Monocentric (University of Virginia, USA) Prospective Observational cohort</p> | <p>n= 300<br/>3 months</p>                                                                                        | <p>Adults hospitalized with ischemic stroke or TIA within 48h of admission</p>                                                                                                                                                                                                                                                                                   | <p>differences in taxonomic make-up and the relative frequency of the gut microbial composition in relation to excellent vs. poor stroke outcome</p> | <p>Stool samples (16s rRNA gene sequencing)<br/><br/>Stroke outcome (NIHSS)</p>                                                                                                                                                                                                                                                                | <p><u>3 months</u><br/><br/>Stool samples (16s rRNA gene sequencing)<br/><br/>Stroke outcome (NIHSS)<br/><br/>Cognitive function</p> |
| <p>Adipose Tissue Content of Fatty Acids Present in Dairy Fat and Risk of Stroke. The Danish Diet, Cancer and Health (DDCH) Cohort [9]</p> <p>NCT03220568</p> |  | <p>the association of adipose tissue content of fatty acids, for which dairy products are a major source * with incident total stroke and stroke subtypes will be investigated</p> <p>* 12:0, 14:0, 14:1 cis-9, 15:0, 17:0, 18:1 trans-11 and 18:2 cis-9, trans-11 fatty acids</p> | <p>Completed (Nov 1993-Nov 2009)</p>               | <p>multi-center (Aarhus, Denmark) prospective observational case-cohort</p>       | <p>n= 5294 (nested in a population –based cohort of n= 57053 FU: baseline till Nov 2009<br/><br/>up to 16 yrs</p> | <p>Danish Cancer, Diet and Health cohort consisted of middle-aged (50-64 yrs) adult Danes from Danish urban areas without history of stroke or cancer at recruitment were followed prospectively. For the case-cohort design all participants with incident stroke (n= 2108) and a random sample without stroke (n= 3186) were included in the current trial</p> | <p>association of adipose tissue fatty acids with incident stroke and stroke subtypes</p>                                                            | <p><u>Upon inclusion in DDCH (= not in the acute phase of stroke)</u><br/><br/>Diet questionnaire<br/><br/>Lifestyle questionnaire<br/><br/>Anthropometry (BMI etc.)<br/><br/>Adipose tissue biopsy (fatty acid composition by gas chromatography)<br/><br/><u>Upon stroke diagnosis</u><br/><br/>Classification of stroke including TOAST</p> | <p>no further follow up after stroke diagnosis</p>                                                                                   |
| <p>MIIDNOR-TIA- a study of 600 patients with TIA [10]</p> <p>NCT02038725</p>                                                                                  |  | <p>to investigate stroke risk after TIA in short (1 week) and long term (3 months/1 year), to assess whether the ABCD2 score is an</p>                                                                                                                                             | <p>Completed (July 2014-July 2015)</p>             | <p>Multi-center (Norway) prospective observational cohort</p>                     | <p>n= 577<br/>1 year</p>                                                                                          | <p>Adults hospitalized with probable or possible TIA within 2 weeks after onset* and mRS &lt;4</p>                                                                                                                                                                                                                                                               | <p>Number of patients presenting with stroke within 1 week after transient ischemic attack</p>                                                       | <p>Clinical Data<br/>ABCD2<br/>Blood sampling<br/>ECG<br/>MRI or CT</p>                                                                                                                                                                                                                                                                        | <p><u>31 week, 3 month, 1 year</u><br/><br/>Stroke number<br/><br/>TIA number</p>                                                    |

|                                                                                                                     |  |                                                                                                                                                                                                              |                                  |                                                                                                                                      |                                                                         |                                                                                                         |                                                                                                                                                          |                                                                                                        |                                                                                                                                                                   |
|---------------------------------------------------------------------------------------------------------------------|--|--------------------------------------------------------------------------------------------------------------------------------------------------------------------------------------------------------------|----------------------------------|--------------------------------------------------------------------------------------------------------------------------------------|-------------------------------------------------------------------------|---------------------------------------------------------------------------------------------------------|----------------------------------------------------------------------------------------------------------------------------------------------------------|--------------------------------------------------------------------------------------------------------|-------------------------------------------------------------------------------------------------------------------------------------------------------------------|
|                                                                                                                     |  | adequate tool for predicting stroke risk and explore whether adopting imaging modalities (ultrasound, MRI) and biological markers of blood into a risk score could improve the predictive value of the ABCD2 |                                  |                                                                                                                                      |                                                                         | (* 85 % were evaluated within 24h after onset)                                                          |                                                                                                                                                          | Carotid Doppler or CT angiography                                                                      | Correlation of ABCD2 with stroke risk                                                                                                                             |
| Patient-centered research into outcomes stroke pats. prefer and effectiveness research (PROSPER)<br><br>NCT02146274 |  | to address existing evidence gaps and develop the requested data on the range of clinical outcomes that may be experienced by stroke survivors                                                               | Completed (Nov 2013-dec 2017)    | Multi-center (pts from a registry of 75 US-sites followed by researchers from Duke University) USA) prospective observational cohort | n= 2000 stroke survivors prospective observational cohort<br><br>1 year | Adult ischemic stroke patients                                                                          | "Days alive and at home", patient-reported outcomes/ QoI and mortality at 1 year                                                                         | not specified                                                                                          | <u>3 +6 months + 1 year (telephone)</u><br><br>Patient reported outcomes/QoL (FSS, PHQ8, MRS, Barthel, EQ-5D, SSQOL-12, IADL)<br><br>mortality, stroke recurrence |
| Korean Stroke Cohort for functioning and rehabilitation (KOSCO) [13]<br><br>NCT03402451                             |  | to identify the factors that influence residual disability and long-term quality of life after first ever stroke                                                                                             | Active, not recruiting           | Multi-center (Korea) prospective observational cohort                                                                                | N= 7858<br><br>10 year FU                                               | Adults of at least 19 yrs of age with first-ever acute ischemic stroke within 7 days prior to inclusion | Barthel, EQoL-5D, activities of daily living, MMST, Aphasia Screening, mRS, Swallowing, geriatric depression, Fugl-Meyer motor assessment, gait function | Fugl Meyer Motor assessment<br><br>Gait function<br><br>Swallowing assessment<br><br>Aphasia screening | <u>3 + 6 months, than annual up to 10 years</u><br><br>See primary outcomes<br><br>Recurrent stroke mortality                                                     |
| <b>German Stroke Registry- Endovascular Treatment</b>                                                               |  | 3 month outcome after endovascular treatment of acute ischemic stroke                                                                                                                                        | Recruiting (June 2015-June 2025) | Multi-center (Germany, including Charité)                                                                                            | n= 2500<br><br>3 month                                                  | all acute stroke patients with the clinical diagnosis of acute ischemic                                 | mRS at 2 months                                                                                                                                          | Clinical Data and History                                                                              | <u>3 month (telephone)</u><br><br>mRS                                                                                                                             |

|                                                                                                                                                                                    |  |                                                                                                                                                 |                                |                                                                     |                       |                                                                                               |                              |                           |                                                                                                                       |
|------------------------------------------------------------------------------------------------------------------------------------------------------------------------------------|--|-------------------------------------------------------------------------------------------------------------------------------------------------|--------------------------------|---------------------------------------------------------------------|-----------------------|-----------------------------------------------------------------------------------------------|------------------------------|---------------------------|-----------------------------------------------------------------------------------------------------------------------|
| NCT03356392                                                                                                                                                                        |  |                                                                                                                                                 |                                | prospective observational cohort                                    |                       | stroke, eligible for IVT and IVT initiated within 4.5 hours after stroke onset, Age >18 years |                              |                           |                                                                                                                       |
| Registry Study for the Observation of Patients With ESUS*/Cryptogenic Stroke (Catch-up ESUS registry study)<br><br>NCT03820375<br><br>*ESUS= Embolic Stroke of Undetermined Source |  | to provide important data for the detection of an individual approach in ESUS patients based on a structured diagnostic and therapeutic pathway | Recruiting (Jan 2018-Jan 2026) | Monocentric (LMU, Munich, Germany) prospective observational cohort | n= 750<br><br>3 years | all adults with ESUS admitted to LMU Munich                                                   | Stroke recurrence at 3 years | Clinical Data and History | <u>3 years</u><br><br>Clinical outcomes: Stroke recurrence, AF detection, other vascular events, predictors of stroke |

### References Stroke

- [1] Liman TG et al.: Prediction of vascular risk after stroke - protocol and pilot data of the Prospective Cohort with Incident Stroke (PROSCIS). Int J Stroke 2013; 8:484-90
- [2] Gupta N et al., NIH Natural History of Stroke Investigators: White Matter Hyperintensity-Associated Blood-Brain Barrier Disruption and Vascular Risk Factors. J Stroke Cerebrovasc Dis 2018; 27:466-71
- [3] Ponchel A et al.: Influence of medication on fatigue six month after stroke. Stroke Res Treat 2016; doi: 10.1155/2016/2410921
- [4] Wollenweber FA et al.: The Determinants of Dementia After Stroke (DEDEMAS) Study: protocol and pilot trial. Int J Stroke 2014; 9:387-92
- [5] Martí-Fàbregas J et al., HERO study investigators: MRI predicts intracranial hemorrhage in patients who receive long-term oral anticoagulation. Neurology 2019; doi: 10.1212/WNL.0000000000007532
- [6] Wilson D et al. on behalf of the CROMIS-2 collaborators: Cerebral microbleeds and intracranial hemorrhage risk in patients anticoagulated for atrial fibrillation after acute ischemic stroke or transient ischemic attack (CROMIS-2): a multicentre observational cohort study. Lancet Neurol 2018; 17:539-47
- [7] Hausler KG et al.. Heart and Brain interfaces in Acute ischemic Stroke (HEBRAS)- rationale and design of a prospective observational cohort study. BMC Neurol 2015; 15:213
- [8] Thingstad P et al.: The Norwegian Cognitive impairment after stroke study (Nor-COAST): study protocol of a multicenter, prospective cohort study. BMC Neurol 2018; 18:193
- [9] Laursen ASD et al.. Adipose tissue fatty acids present in dairy fat and risk of stroke: the Danish Diet, Cancer and Health cohort. Eur J Nutr 2019; 58:529-539

[10] Ildstad F et al.: Stroke risk after transient ischemic attack in a Norwegian prospective cohort. *BMC Neurol.* 2019; 19:2. doi: 10.1186/s12883-018-1225-y.

[11] Elkind MSV et al.: The Levels of Inflammatory Markers in the Treatment of Stroke (LIMITS) Study: inflammatory biomarkers as risk predictors after lacunar stroke. *Int J Stroke* 2012; 5:117-125

[12] Boehme AK et al: Inflammatory markers and outcomes after lacunar stroke: Levels of Inflammatory Markers in Treatment of Stroke Study. *Stroke* 2016; 47:659-667

[13] Chang WH et al.: Predictors of functional level and quality of life at 6 months after a first ever stroke: the KOSCO study. *J Neurol* 2016; 263:1166-77

## Important recent Diabetes mellitus cohorts

| Name                                                           | Main Objective                                                                                                                                                              | Status                                           | Study type                                                   | N Follow up (FU)          | Participant characteristics                                              | Phenotyping                                                                                                                                                                                                                                                                                                                                                                                                                                                                                                                                                                                                                                                                                                                                                                                                                                                                                                                                                                                                                                                  |
|----------------------------------------------------------------|-----------------------------------------------------------------------------------------------------------------------------------------------------------------------------|--------------------------------------------------|--------------------------------------------------------------|---------------------------|--------------------------------------------------------------------------|--------------------------------------------------------------------------------------------------------------------------------------------------------------------------------------------------------------------------------------------------------------------------------------------------------------------------------------------------------------------------------------------------------------------------------------------------------------------------------------------------------------------------------------------------------------------------------------------------------------------------------------------------------------------------------------------------------------------------------------------------------------------------------------------------------------------------------------------------------------------------------------------------------------------------------------------------------------------------------------------------------------------------------------------------------------|
| Metabolic Syndrome Berlin Potsdam (MeSyBePo)                   | to identify genetic variants of nutritive-metabolic phenotypes                                                                                                              | recruiting 2002-2009                             | prospective case-control cohort                              | n= 2600                   | adults with or without metabolic syndrome or impaired glucose metabolism | <ul style="list-style-type: none"> <li>Anthropometry, BMI, Waist-hip-ratio</li> <li>OGTT</li> <li>Lifestyle and medical history</li> <li>Bio-sampling/ genomics</li> </ul>                                                                                                                                                                                                                                                                                                                                                                                                                                                                                                                                                                                                                                                                                                                                                                                                                                                                                   |
| The UK prospective diabetes study (UKPDS)                      | determine whether: 1. improved blood glucose control and: 2. improved antihypertensive control will prevent complications and reduce the associated morbidity and mortality | Recruitment from 1977-1997                       | Multi-center, (UK) Prospective randomized intervention trial | N= 5102<br>9 (3-16) years | 25 to 65 years newly diagnosed pats with T2DM (non-insulin-dependent)    | Major clinical events<br>Behavioral History<br>Bio-sampling (LDL, HDL and other biochemical variables)                                                                                                                                                                                                                                                                                                                                                                                                                                                                                                                                                                                                                                                                                                                                                                                                                                                                                                                                                       |
| PPP-Botnia – Prevalence, Prediction and Prevention of Diabetes | impact of a family history of type 2 diabetes on physical fitness, lifestyle factors and diabetes-related metabolic factors                                                 | Recruitment from 2004-2008, Follow up start 2011 | Multi-center (Finland) Prospective Population-based cohort   | n= 5200<br>6 years        | adults 18-78 yrs randomly followed in Western Finland                    | <p><u>Baseline</u></p> <ul style="list-style-type: none"> <li>Information on exercise and food habits -psychosocial factors</li> <li>sleeping pattern</li> <li>2 km walking test</li> </ul> <p><u>6 years FU study</u></p> <ul style="list-style-type: none"> <li>more detailed food frequency questionnaire -blood samples during glucose tolerance test for additional hormones (e.g. incretins)</li> <li>collaborative project with Broad, Fusion and Wellcome Trust currently performing genome-wide sequencing (x6), exome sequencing and 2.5 M Illumina chip on 1500 patients with T2DM and 1500 non-diabetic controls, of whom 2000 come from Finland (Botnia and Fusion)</li> <li>Illumina Exome chip (every non-synonymous variant observed at frequency &gt;0.1% in populations) will also be used to genotype 5000 T2DM from Botnia &amp; Direva Studies (Direva = Diabetes Register in Vasa region connected with Botnia Study) and 5000 control subjects from the PPP-Botnia (genotypes data will be available for whole PPP-Botnia)</li> </ul> |

|                                                                                                                               |                                                                                                                                                 |                            |                                                                                               |                     |                                                   |                                                                                                                                                                                                                                                                                                                                                                                                                                                                                                                                                                                                                                                                 |
|-------------------------------------------------------------------------------------------------------------------------------|-------------------------------------------------------------------------------------------------------------------------------------------------|----------------------------|-----------------------------------------------------------------------------------------------|---------------------|---------------------------------------------------|-----------------------------------------------------------------------------------------------------------------------------------------------------------------------------------------------------------------------------------------------------------------------------------------------------------------------------------------------------------------------------------------------------------------------------------------------------------------------------------------------------------------------------------------------------------------------------------------------------------------------------------------------------------------|
| The Madrid Diabetes Study (MADIABETES Study)                                                                                  | epidemiological investigation of diabetes type 2                                                                                                | Recruitment from 2007-2011 | Multicentre (Madrid, Spain) prospective observational cohort                                  | n= 3443             | age >30 years-old, T2DM outpatients               | <u>Baseline + annual FU up to 4 years</u> <ul style="list-style-type: none"> <li>● History</li> <li>● Eye exam</li> <li>● Physical exam</li> <li>● Biochemical tests</li> </ul>                                                                                                                                                                                                                                                                                                                                                                                                                                                                                 |
| Netherlands Epidemiological Study of Obesity (NEO)                                                                            | extensive phenotyping to investigate pathways that lead to obesity-related diseases                                                             | Recruitment from 2008-2013 | Multicenter (Netherlands) Prospective Population-based cohort                                 | n= 6673<br>longterm | obese (BMI >27) 45-65                             | <u>Baseline</u> <ul style="list-style-type: none"> <li>● demography, lifestyle, and medical history</li> <li>● samples of 24-h urine</li> <li>● fasting and postprandial blood plasma and serum (including mixed meal analysis)</li> <li>● DNA/Genomics</li> <li>● extensive physical examination</li> <li>● electrocardiography</li> <li>● spirometry</li> <li>● carotid artery intima-media thickness</li> <li>● MRI in subsets</li> </ul> <u>Follow up</u> <ul style="list-style-type: none"> <li>● through GP practices in the community</li> <li>● causes of death through national registries</li> <li>● second visit to CRU about to commence</li> </ul> |
| DIACORE (DIAbetes COhortE) – a cohort study of patients with diabetes mellitus type 2 prospective cohort (10 years follow-up) | generate hypotheses for innovative strategies in DM2 management by unravelling novel mechanisms of diabetes complications                       | Start 2010                 | Multicenter (Germany) Prospective                                                             | N= 6000<br>10 years | Adults of Caucasian ethnicity with prevalent T2DM | <u>Baseline &amp; bi-annual FU up to 2 years</u> <ul style="list-style-type: none"> <li>● online questionnaire and physical examination for incident micro- and macrovascular DM2 complications, malignancy and hospitalization, primary focus on renal events</li> <li>● blood samples for standard laboratory panel and biobanking of aliquots of serum, plasma, urine, mRNA and DNA</li> <li>● extended phenotyping, e.g. sleep apnea screening, skin autofluorescence measurement, non-mydratic retinal photography and non-invasive determination of arterial stiffness</li> </ul>                                                                         |
| Discover study                                                                                                                | aim is to describe the patient characteristics, evolution of disease management patterns and clinical outcomes over 3 years in individuals with | Start 2014                 | Multicenter international (38 countries, six continents) prospective non-interventional study | N= 15000<br>3 years | Adults with T2DM                                  | <u>Baseline &amp; FU up to 3 years</u> <ul style="list-style-type: none"> <li>● laboratory tests/ smaller challenge</li> <li>● micro-and macrovascular complications</li> <li>● questionnaires</li> </ul>                                                                                                                                                                                                                                                                                                                                                                                                                                                       |

|                                                                                                                 |                                                                                                                                                                       |                         |                                                                                                    |                                                                        |                                              |                                                                                                                                                                                                                                                                                                                                                 |
|-----------------------------------------------------------------------------------------------------------------|-----------------------------------------------------------------------------------------------------------------------------------------------------------------------|-------------------------|----------------------------------------------------------------------------------------------------|------------------------------------------------------------------------|----------------------------------------------|-------------------------------------------------------------------------------------------------------------------------------------------------------------------------------------------------------------------------------------------------------------------------------------------------------------------------------------------------|
|                                                                                                                 | type 2 diabetes mellitus who are initiating a second-line anti-diabetic therapy in real world settings                                                                |                         |                                                                                                    |                                                                        |                                              |                                                                                                                                                                                                                                                                                                                                                 |
| Hoorn-Studies                                                                                                   | first to identify patients with subclinical T2DM, then use cohort for cardiovascular risk assessment.                                                                 | 1989-1991 and 2006-2007 | Regional (Hoorn, West-Friesland, Netherlands) prospective population-based cohort                  | N= 5291<br>10-25 yrs                                                   | Adults aged 40-75 yrs from Hoorn             | <p><u>Baseline + FU</u><br/> Glucose metabolism<br/> Anthropometry<br/> Lipid levels<br/> Renal function<br/> Blood pressure<br/> Family history<br/> Behavioral measures<br/> Blood sampling/ Biobanking (including DNA)</p> <p><u>FU subgroup</u><br/> Diabetes complications<br/> Cardiac and vascular structure and function (e.g. IMT)</p> |
| European Prospective Investigation into Cancer and Nutrition (EPIC), including EPIC-Heart/EPIC-CVD and InterAct | Original focus of EPIC was on diet and cancer. EPIC-Heart focusses on coronary mortality. EPIC-CVD extends to cardiovascular morbidity. InterAct focusses on diabetes |                         | Multi-center, international (10 European countries) Population-based cohort                        | N= 519.978<br>longterm                                                 | Adults aged 25-70                            | <p><u>Focus on assessment of diet</u><br/> questionnaires<br/> Antropometry<br/> Heart rate<br/> Blood pressure</p>                                                                                                                                                                                                                             |
| DIAB-CORE consortium                                                                                            | to establish a joint pool of population-based data on persons with and without diabetes                                                                               | 1997-2006               | pooled cross-sectional data from 5 population-based German studies (1997-2006); the Cardiovascular | n= 15071 of which 1287 were diagnosed with T2DM (as reported in 2012*) | Adults with or without T2DM 45-74 yrs of age | <p>Focus on regional differences and factors such as blood pressure control, unemployment, gender in diabetes **</p> <p>*<a href="https://cardiab.biomedcentral.com/articles/10.1186/1475-2840-11-50">https://cardiab.biomedcentral.com/articles/10.1186/1475-2840-11-50</a></p>                                                                |



|                                                                                                                                        |                                                                                                                                                                                 |            |                                                                                                                                                                                                                                           |                                                                            |                                                                                                         |                                                                                                                                                                                                                                                                                                                                                                                                     |
|----------------------------------------------------------------------------------------------------------------------------------------|---------------------------------------------------------------------------------------------------------------------------------------------------------------------------------|------------|-------------------------------------------------------------------------------------------------------------------------------------------------------------------------------------------------------------------------------------------|----------------------------------------------------------------------------|---------------------------------------------------------------------------------------------------------|-----------------------------------------------------------------------------------------------------------------------------------------------------------------------------------------------------------------------------------------------------------------------------------------------------------------------------------------------------------------------------------------------------|
|                                                                                                                                        |                                                                                                                                                                                 |            | Disease, Living and Ageing in Halle (CARLA) Study, the Dortmund Health Study, the Heinz Nixdorf Recall Study (HNRS), the Cooperative Health Research in the Region of Augsburg Study (KORA), and the Study of Health in Pomerania (SHIP). |                                                                            |                                                                                                         | ** <a href="https://www.ncbi.nlm.nih.gov/pubmed/?term=diab-core">https://www.ncbi.nlm.nih.gov/pubmed/?term=diab-core</a>                                                                                                                                                                                                                                                                            |
| Deutsche Diabetes-Studie                                                                                                               | evaluation of predictors of diabetes complications and investigation on different therapeutical strategies                                                                      | recruiting | Multi-center (Germany) prospective observational                                                                                                                                                                                          | n= 1000 in year 2017 (final recruiting goal not specified)<br><br>10 years | Adults 18-69 yrs with newly diagnosed T1DM or T2DM within 12 months after diagnosis vs. healthy control | <u>Baseline, 5 + 10 years</u> <ul style="list-style-type: none"> <li>● Physical exam</li> <li>● ECG</li> <li>● Body Fat Composition</li> <li>● Blood pressure</li> <li>● Physical fitness (ergometry)</li> <li>● Calorimetry</li> <li>● Specialized exam of vascular system, eyes, nerves and kidney</li> <li>● _____ Metabolic MRI (liver and muscle)</li> </ul> <u>Annual telephone interview</u> |
| Individual variability in response to renin angiotensin aldosterone system inhibition predicts cardiovascular outcome in patients with | to assess variability in systolic blood pressure (SBP) and albuminuria (urinary albumin creatinine ratio [UACR]) responses in patients with type 2 diabetes mellitus initiating | 2007-2013  | multi-center (Netherlands) prospective cohort                                                                                                                                                                                             | n = 1600<br><br>15 months                                                  | patients with T2DM who started RAAS inhibition                                                          | <u>Baseline and FU up to 15 months</u> <ul style="list-style-type: none"> <li>● Clinical data, Risk factors, diabetes complications</li> <li>● variability in blood pressure</li> <li>● _____ albuminuria</li> </ul><br>* <a href="https://www.ncbi.nlm.nih.gov/pmc/articles/PMC5969103/">https://www.ncbi.nlm.nih.gov/pmc/articles/PMC5969103/</a>                                                 |

|                                                                                                                           |                                                                                                                                              |               |                                                        |                                   |                                                                            |                                                                                                                                                                                                                                                                                                                                                                                                                                                                                                                                                                                                              |
|---------------------------------------------------------------------------------------------------------------------------|----------------------------------------------------------------------------------------------------------------------------------------------|---------------|--------------------------------------------------------|-----------------------------------|----------------------------------------------------------------------------|--------------------------------------------------------------------------------------------------------------------------------------------------------------------------------------------------------------------------------------------------------------------------------------------------------------------------------------------------------------------------------------------------------------------------------------------------------------------------------------------------------------------------------------------------------------------------------------------------------------|
| T2DM: A primary care cohort study                                                                                         | renin angiotensin aldosterone system (RAAS) inhibition, and to assess the association of response variability with cardiovascular outcomes * |               |                                                        |                                   |                                                                            |                                                                                                                                                                                                                                                                                                                                                                                                                                                                                                                                                                                                              |
| Substudy of: Taiwan's National Health Insurance Research Database (NHIRD) for this study.<br><br>prospective cohort study | Safety and cardiovascular effects of DPP-4i in a nationally representative sample of elderly adults with T2D.                                | 2009 and 2013 | Multi-center (Taiwan) prospective observational cohort | N = 58485<br><br>2.2 years (mean) | Patients aged ≥65 years with the diagnosis of T2DM registered in the NHIRD | age, sex, monthly income, urbanization level, Charlson Comorbidity Index score, number of outpatient visits to metabolism and endocrinology professionals in the past year, adapted Diabetes Complications Severity Index (aDCSI) score, duration of T2D, other concomitant medications (other antidiabetic drugs, antihypertensive drugs, aspirin, clopidogrel, ticlopidine, nonsteroidal anti-inflammatory drugs, and statins), and baseline major comorbidities                                                                                                                                           |
| Edinburgh Type 2 Diabetes Study (ET2DS), a prospective cohort study                                                       | association of NTproBNP with traditional cardiovascular risk factors and incident cardiovascular events                                      | 2006-2007     | Regional (Edinburgh, Scotland, UK) prospective cohort  | N= 1066<br><br>4 years            | patients aged 60 to 75 years with T2DM from Edinburgh                      | <ul style="list-style-type: none"> <li>● BMI</li> <li>● diabetes history, history of CVD</li> <li>● social status</li> <li>● smoking habits</li> <li>● HbA1c, total cholesterol, HDL-cholesterol, eGFR, ACR, SBP, DBP Plasma</li> <li>● NT-proBNP</li> <li>● _____ CVD events</li> </ul>                                                                                                                                                                                                                                                                                                                     |
| Observational study from the Swedish National Diabetes Register (S-NDR)                                                   | effect of HbA1c and total cholesterol/ HDL-cholesterol ratio (TC/HDL) on risk of CVD.                                                        | 2000-2007     | National (Sweden) prospective cohort                   | N= 22135<br><br>5 years           | Adults 30-75 yrs with T2DM registers in the S-NDR                          | <u>Baseline</u> <ul style="list-style-type: none"> <li>● BMI</li> <li>● diabetes history, history of CVD</li> <li>● smoking status</li> <li>● HbA1c, total cholesterol, HDL-cholesterol, tracylglycerol</li> <li>● Microalbuminuria</li> <li>● medication</li> </ul><br><u>Follow up (up to 5 years)</u> <ul style="list-style-type: none"> <li>● stroke, MI, vascular death</li> <li>● unstable angina, coronary angiography, revascularization, AF</li> </ul><br><a href="https://link.springer.com/article/10.1007%2Fs00125-011-2218-1">https://link.springer.com/article/10.1007%2Fs00125-011-2218-1</a> |

|                                                                                                                                                                         |                                                                                                                                                                                                                                                      |           |                                     |                                                          |                                                                                          |                                                                                                                                                                                                                                                                                                                                                                                                                                                                                                                                                                                                                                                                         |
|-------------------------------------------------------------------------------------------------------------------------------------------------------------------------|------------------------------------------------------------------------------------------------------------------------------------------------------------------------------------------------------------------------------------------------------|-----------|-------------------------------------|----------------------------------------------------------|------------------------------------------------------------------------------------------|-------------------------------------------------------------------------------------------------------------------------------------------------------------------------------------------------------------------------------------------------------------------------------------------------------------------------------------------------------------------------------------------------------------------------------------------------------------------------------------------------------------------------------------------------------------------------------------------------------------------------------------------------------------------------|
|                                                                                                                                                                         |                                                                                                                                                                                                                                                      |           |                                     |                                                          |                                                                                          |                                                                                                                                                                                                                                                                                                                                                                                                                                                                                                                                                                                                                                                                         |
| Extracted data from the CALIBER programme (CARDIOVASCULAR disease research using Linked Bespoke studies and Electronic health Records)                                  | Study associations between T2DM and 12 initial manifestations of cardiovascular disease (stable angina, unstable angina, myocardial infarction, unheralded coronary death, heart failure, transient ischaemic attack, ischaemic stroke, subarachnoid | 1997-2010 | multicenter (UK) prospective cohort | N= 1.921260/ 34.198 with T2DM<br><br>5.5 yrs (median FU) | Registered patients aged ≥30 years old with no history of CV events in England.          | <ul style="list-style-type: none"> <li>● BMI</li> <li>● HDL</li> <li>● Cholesterol</li> <li>● total cholesterol</li> <li>● SBP</li> <li>● DBP</li> <li>● social deprivation</li> <li>● smoking status</li> <li>● HbA1c</li> <li>● Diabetes treatment</li> <li>● Cardiovascular preventive treatment</li> </ul>                                                                                                                                                                                                                                                                                                                                                          |
| Metabolic consequences of adipose tissue dysfunction and not adiposity per se increase the risk of cardiovascular events and mortality in patients with type 2 diabetes | to quantify the risk of obesity and its associated metabolic dysfunction on the development of cardiovascular events and mortality in patients with type 2 diabetes                                                                                  | 1996-2014 | prospective cohort                  | N= 1827<br><br>7yrs (median FU)                          | T2DM Patients from the Secondary Manifestations of ARterial disease (SMART) cohort study | <u>Baseline</u> <ul style="list-style-type: none"> <li>● BMI</li> <li>● Waits circumference</li> <li>● anthropometry</li> <li>● standardized estimate of intra-abdominal fat b ultrasound</li> <li>● cardiovascular history, risk factors, medication</li> <li>● physical activity</li> <li>● HbA1c, triglyzerides, HDL, hsCRP</li> </ul> <u>Biannually, 7 yrs median</u> <ul style="list-style-type: none"> <li>● stroke, MI, heart failure, vascular death, all-cause death</li> </ul><br><a href="https://www.sciencedirect.com/science/article/pii/S0167527316314280?via%3Dihub">https://www.sciencedirect.com/science/article/pii/S0167527316314280?via%3Dihub</a> |
| Long-term visit-to-visit glycemic variability as predictor of micro- and macrovascular                                                                                  | to evaluate the prognostic value of several measures of glycemic variability for the occurrence of                                                                                                                                                   | 2004-2008 | prospective cohort                  | N= 654<br><br>9,3 yrs (median FU)                        | T2DM in Rio de Janeiro                                                                   | <ul style="list-style-type: none"> <li>● Electrocardiography</li> <li>● ischemic stress tests</li> <li>● physical examination</li> <li>● ankle-brachial index</li> <li>● SBP, DBP,</li> <li>● microalbuminuria, eGFR,</li> <li>● peripheral neuropathy (clinical examination)</li> </ul>                                                                                                                                                                                                                                                                                                                                                                                |

|                                                                                                                                         |                                                                                                                                                                                                                                  |                     |                                     |                                                                                                                          |                                                                                    |                                                                                                                                                                                                                                                                                           |
|-----------------------------------------------------------------------------------------------------------------------------------------|----------------------------------------------------------------------------------------------------------------------------------------------------------------------------------------------------------------------------------|---------------------|-------------------------------------|--------------------------------------------------------------------------------------------------------------------------|------------------------------------------------------------------------------------|-------------------------------------------------------------------------------------------------------------------------------------------------------------------------------------------------------------------------------------------------------------------------------------------|
| complications in patients with type 2 diabetes: The Rio de Janeiro Type 2 Diabetes Cohort Study                                         | micro- and macrovascular complications, and all-cause mortality in patients with T2DM                                                                                                                                            |                     |                                     |                                                                                                                          |                                                                                    | <ul style="list-style-type: none"> <li>• neuropathic symptoms by questionnaire</li> <li>• fasting glycemia</li> <li>• HbA1c</li> <li>• serum creatinine and lipids</li> </ul>                                                                                                             |
| Blood pressure levels and risk of cardiovascular events and mortality in type-2 diabetes: cohort study of 34 009 primary care patients. | investigate the shapes of the associations of SBP and DBP to risk of a composite cardiovascular disease endpoint or total mortality of T2DM patients without previous cardiovascular disease                                     | 1999-2008           | prospective cohort                  | N= 34009<br><br>Up to 11 yrs                                                                                             | T2DM patients older than 35 years in Sweden                                        | <ul style="list-style-type: none"> <li>• SBP, DBP, BP</li> <li>• BMI, waist circumference</li> <li>• total, cholesterol(total, LDL, HDL) triglycerides, glycosylated hemoglobin (HbA1c), eGFR</li> <li>• smoking,</li> <li>• medication (lipid-, glucose-, and BP-lowering)</li> </ul>    |
| Dipeptidyl peptidase-4 inhibitors do not increase the risk of cardiovascular events in type 2 diabetes: a cohort study.                 | to evaluate the risk of composite CVD including MI, stroke, coronary revascularization, and HF associated with initiation of DPP4i compared to initiation of other diabetes drugs in T2DM patients with and without baseline CVD |                     | prospective cohort                  | N = 79538<br><br>mean 0.7 years for DPP4i and 0.5 years for non-DPP4i initiators; (13297 individuals had FU over 1 year) | patients with T2DM from US commercial insurance claim data with either DPP4 or not | <ul style="list-style-type: none"> <li>• DM-related comorbidities</li> <li>• CVD and other comorbidities</li> <li>• Medications</li> <li>• healthcare utilization factors,</li> <li>• Bio-sampling (serum BUN, creatinine, HbA1c)</li> <li>• comorbidity score</li> </ul>                 |
| Lower mortality and cardiovascular event rates in patients with Latent Autoimmune Diabetes In Adults (LADA) as                          | to determine to what extent the prognosis of LADA patients regarding long-term risk of mortality and cardiovascular outcomes is                                                                                                  | recruited 1997-2012 | retrospective cohort<br><br>6,6 yrs | n= 4368 (T2DM n = 3539)                                                                                                  | patients with diabetes mellitus (T2DM, LADA, IDD) in southern Denmark              | <ul style="list-style-type: none"> <li>• hospital history before diabetes</li> <li>• 19 comorbidities (from in the Charlson comorbidity index)</li> <li>• major risk factors for CVD and death</li> <li>• chronic pulmonary disease, liver disease, renal disease, and cancer.</li> </ul> |

|                                                                                                                      |                                                                                                                                                                    |                                                    |                                 |                                              |                                                         |                                                                                                                                                                                                                                                                                                                                                                                                                                                            |
|----------------------------------------------------------------------------------------------------------------------|--------------------------------------------------------------------------------------------------------------------------------------------------------------------|----------------------------------------------------|---------------------------------|----------------------------------------------|---------------------------------------------------------|------------------------------------------------------------------------------------------------------------------------------------------------------------------------------------------------------------------------------------------------------------------------------------------------------------------------------------------------------------------------------------------------------------------------------------------------------------|
| compared with type 2 diabetes and insulin deficient diabetes: A cohort study of 4368 patients*                       | different from that of T2D                                                                                                                                         |                                                    |                                 |                                              |                                                         | *Wod et al. Diabetes Res Clin Pract. 2018                                                                                                                                                                                                                                                                                                                                                                                                                  |
| Hypertensive diabetic patients: incidence of cardiovascular and renal outcomes in a historical cohort over 11 years* | identify non-fatal cardiovascular outcomes and renal function impairment in a cohort of hypertensive patients in regular treatment in a reference treatment center | Recruited in 2004 with follow-ups in 2009 and 2015 | prospective cohort              | n = 139 (T2DM N = 55)<br>Follow up: 11 years | T2DM in hypertension treatment center in midwest Brazil | <ul style="list-style-type: none"> <li>● gender, race, age,</li> <li>● physical activity, alcohol consumption, smoking</li> <li>● blood pressure, BMI, glycated hemoglobin, lipid profile</li> <li>● diabetes and hypertension diagnosis times, treatment time in specialized service</li> <li>● non-fatal cardiovascular outcomes</li> <li>● renal impairment assessed by creatinine clearance</li> </ul> <p>~Sousa et al. Diabetol Metab Syndr. 2017</p> |
| TUebinger Lebensstil Interventions Programm (TULIP Diabetes Präventionsstudie)                                       | identification of predictive parameters for the responsiveness to and necessity for lifestyle intervention                                                         | 2003-2009                                          | interventional (diet and sport) | n= 1635                                      | adults with prediabetes/ T2DM                           | <u>Baseline, 6 months, 2 years</u> <ul style="list-style-type: none"> <li>● Blood sampling/ DNA</li> <li>● OGTT</li> <li>● Calorimetry</li> <li>● Physical fitness</li> <li>● Metabolic MRI/Mr spectroscopy (abdominal and muscle)</li> <li>● Magnet Encephalographia (MEG)</li> </ul>                                                                                                                                                                     |

## Relevant recent Acute Kidney Injury (AKI) cohorts

| Name                                                                                                                                            | Main Objective                                                                                                                                                                                                                                                                                                      | Status                | Study type                                                | n & observation period                                | Participant characteristics                                                                                                                                                       | Main Outcome                                                                                                                                                                                                                                                                                                                                                                                                                                         | Acute Phenotyping                                                                                                                             | Follow up      |
|-------------------------------------------------------------------------------------------------------------------------------------------------|---------------------------------------------------------------------------------------------------------------------------------------------------------------------------------------------------------------------------------------------------------------------------------------------------------------------|-----------------------|-----------------------------------------------------------|-------------------------------------------------------|-----------------------------------------------------------------------------------------------------------------------------------------------------------------------------------|------------------------------------------------------------------------------------------------------------------------------------------------------------------------------------------------------------------------------------------------------------------------------------------------------------------------------------------------------------------------------------------------------------------------------------------------------|-----------------------------------------------------------------------------------------------------------------------------------------------|----------------|
| The assessment, serial evaluation, and subsequent sequelae of acute kidney injury (ASSESS-AKI) study: design and methods. [1]                   | to characterize the short-term and long-term natural history of AKI, evaluate the incremental utility of novel blood and urine biomarkers to refine the diagnosis and prognosis of AKI, and identify a subset of high-risk patients who could be targeted for future clinical trials to improve outcomes after AKI. | ongoing               | prospective observational cohort (registry)               | n=1100 adults + 100 children<br><br>48 moth follow up | adult participants with a broad range of AKI and matched hospitalized participants without AKI; additionally children undergoing cardiac surgery requiring cardiopulmonary bypass | Primary renal outcome: change of renal function, incident of CKD, progression of CKD, development of ESRD, incident or recurrent episodes of AKI;<br><br>Cardiovascular outcomes: CAD, CHF, cardiac arrhythmias;<br><br>Cerebrovascular outcomes: stroke, intracranial hemorrhage, carotid endarterectomy;<br><br>Peripheral arterial disease outcomes: aortic aneurysm, lower extremity arterial revascularization or amputation;<br><br>Mortality. | Clinical data and history<br><br>QOL questionnaire, anthropometry, blood pressure, Urinalysis ECG<br><br>Blood and Urine sampling/<br>DNA/RNA | 4 years        |
| Acute kidney injury increases the risk of end-stage renal disease after cardiac surgery in an Asian population: a prospective cohort study. [2] | to study the the long-term risk of ESRD and mortality in our Asian patients who developed AKI after cardiac surgery                                                                                                                                                                                                 | Completed (2008-2012) | multi-center (Singapore) prospective observational cohort | n= 2666<br><br>5 years                                | adults patients who underwent cardiac surgery                                                                                                                                     | Development of ESRD and mortality                                                                                                                                                                                                                                                                                                                                                                                                                    | Clinical data and history                                                                                                                     | <u>5 years</u> |

|                                                                                                                                                                |                                                                                                                                                                        |                                          |                                                               |                     |                                                                                                          |                                                                                          |                           |                 |
|----------------------------------------------------------------------------------------------------------------------------------------------------------------|------------------------------------------------------------------------------------------------------------------------------------------------------------------------|------------------------------------------|---------------------------------------------------------------|---------------------|----------------------------------------------------------------------------------------------------------|------------------------------------------------------------------------------------------|---------------------------|-----------------|
| Incidence, risk factors and 90-day mortality of patients with acute kidney injury in Finnish intensive care units: the FINNAKI study. [3]                      | to determine the incidence, risk factors and outcome of acute kidney injury (AKI) in Finnish ICUs                                                                      | Completed (September 2011-February 2012) | multi-center (Finland) prospective observational cohort       | n= 2901<br>3 year   | Adults admitted to an ICU with or without AKI                                                            | Mortality at 90-days, 1 year and 3 years                                                 | Clinical data and history | <u>3 years</u>  |
| Small Acute Increases in Serum Creatinine Are Associated with Decreased Long-Term Survival in the Critically Ill. [4]                                          | To evaluate the impact of acute but small changes in SCr (stage 1 AKI) on long-term survival in a cohort of critically ill patients admitted to an intensive care unit | Completed (2000-2009)                    | Single-center prospective observational cohort                | n= 1844<br>10 years | Adult patients admitted to an ICU with AKI Stage I or without AKI                                        | Mortality during follow up period                                                        | Clinical data and history | <u>10 years</u> |
| Three-year outcomes after acute kidney injury: results of a prospective parallel group cohort study. [5]                                                       | to characterise the effect of acute kidney injury (AKI) on long-term changes in renal function in a general hospital population.                                       | Completed (September 2011-October 2012)  | Single-centre prospective matched parallel group cohort study | N= 300<br>3 years   | Adult patients who sustained AKI at any point during hospital admission and matched patients without AKI | Renal function and CKD progression, prevalence of proteinuria and albuminuria; Mortality | Clinical data and history | <u>3 years</u>  |
| Post-operative acute kidney injury and five-year risk of death, myocardial infarction, and stroke among elective cardiac surgical patients: a cohort study [6] | To examine the five-year risk of death, myocardial infarction, and stroke after elective cardiac surgery complicated by AKI.                                           | Completed (April 2005-October 2007)      | Single-centre prospective cohort study                        | N= 1030<br>5 years  | Adult patients who underwent acute and elective cardiac surgery                                          | death, myocardial infarction and stroke                                                  | Clinical data and history | <u>5 years</u>  |

## References AKI

[1] Go AS, et al., The assessment, serial evaluation, and subsequent sequelae of acute kidney injury (ASSESS-AKI) study: design and methods. BMC Nephrol. 2010 Aug 27;11:22. doi: 10.1186/1471-2369-11-22.

[2] Chew et al., Acute kidney injury increases the risk of end-stage renal disease after cardiac surgery in an Asian population: a prospective cohort study. BMC Nephrology 2017; Feb 13;18(1):60. doi: 10.1186/s12882-017-0476-y.

[3] Mildh H. et al., Three-year mortality in 30-day survivors of critical care with acute kidney injury: data from the prospective observational FINNAKI study. Ann Intensive Care 2016; Dec;6(1):118. doi: 10.1186/s13613-016-0218-5. Epub 2016 Nov 29.

[4] Linder et al.: Long-Term Survival after Critical Illness with Acute Kidney Injury. Am J Respir Crit Care Med. 2014 May 1;189(9):1075-81. doi: 10.1164/rccm.201311-2097OC.

[5] Horne et al., Three-year outcomes after acute kidney injury: results of a prospective parallel group cohort study. BMJ Open 2017 Mar 29;7(3):e015316. doi: 10.1136/bmjopen-2016-015316.

[6] Hansen et al., Post-operative acute kidney injury and five-year risk of death, myocardial infarction, and stroke among elective cardiac surgical patients: a cohort study. Crit Care. 2013 Dec 12;17(6):R292. doi: 10.1186/cc13158.

### Important other (population-based) cohorts with a primary/significant focus on vascular diseases

| Name                                                        | Main Objective                                                                              | Status     | Study type                         | N<br>Follow up (FU) | Participant characteristics                          | Main Outcome                                                                            | Follow up Phenotyping                                        |
|-------------------------------------------------------------|---------------------------------------------------------------------------------------------|------------|------------------------------------|---------------------|------------------------------------------------------|-----------------------------------------------------------------------------------------|--------------------------------------------------------------|
| Second Manifestations of ARterial disease (SMART) study [1] | focus on the evaluation of subclinical arterial disease (prevalence, related to future CVD) | since 1996 | Monocentric (Utrecht, Netherlands) | N > 10.000          | Adults from 18-79 yrs referred to Utrecht University | Vascular death, stroke, myocardial infarction, aortic aneurysm rupture. End-stage renal | <u>Baseline</u><br>History and Risk factors<br>Anthropometry |



|                                                                            |                                                                                                                                                                           |                                                                                             |                                                                       |                                                                                                                                                |                                                                                                                                                                                                                                             |                                                                                                                     |                                                                                                                                                                                                                     |
|----------------------------------------------------------------------------|---------------------------------------------------------------------------------------------------------------------------------------------------------------------------|---------------------------------------------------------------------------------------------|-----------------------------------------------------------------------|------------------------------------------------------------------------------------------------------------------------------------------------|---------------------------------------------------------------------------------------------------------------------------------------------------------------------------------------------------------------------------------------------|---------------------------------------------------------------------------------------------------------------------|---------------------------------------------------------------------------------------------------------------------------------------------------------------------------------------------------------------------|
|                                                                            | events, effectiveness of treatment strategies)                                                                                                                            |                                                                                             | prospective observational cohort                                      |                                                                                                                                                | Hospital with either atherosclerotic disease (carotid artery stenosis, TIA/ minor stroke, PAD, diabetic foot, abdominal aortic aneurysm, angina pectoris, myocardial infarction) OR for risk factor treatment (diabetes, hypertension etc.) | failure, leg amputation                                                                                             | Biosampling (Blood plasma, Urine)<br>Exercise challenge (treadmill test)<br>ECG, kidney ultrasound, carotid ultrasound/ IMT<br>Brain MRI substudy (from 2001-2005, ~1200 pts)<br><u>Follow up</u><br>Questionnaires |
| KORA (Kooperative Gesundheitsforschung in der Region Augsburg) Project [2] | focus pathogenesis of CVD, Diabetes and lung disease, in particular                                                                                                       | Latest studies completed in 2014, currently continued as register for myocardial infarction | Regional (Augsburg, Germany) prospective population-based cohort      | n= 18.000 local participants of the WHO's MONICA-project (a population-based global study to evaluate trends in CVD)<br><br>longterm Follow up | Population-based cohort from the Augsburg region                                                                                                                                                                                            | Multiple, e.g. in particular role of psychosocial, socioeconomic, environmental, lifestyle and genetic risk factors | Biosamples (Blood, DNA, RNA, Immunophenotyping Urine, saliva, stool)<br>Anthropometry<br>OGTT<br>Lung function<br>ABI                                                                                               |
| Kopenhagen City Heart Study [3]                                            | describing the distribution of known cardiovascular risk factors as well as the prevalence and incidence of cardio/cerebrovascular disease in a random population sample; | since 1975                                                                                  | Monocentric (Copenhagen, Denmark) Prospective population-based cohort | n= 20.000                                                                                                                                      | Adults from 20-93 yrs from a clearly defined area in central Copenhagen                                                                                                                                                                     | inclusion in numerous sub-studies                                                                                   | 4 different exam appointments scheduled<br>- Bloodsample (Lipids, glucose); pulmonary function<br>- Anthropometry, ECG<br>-Bio-sampling (microalbuminuria, lipids, coagulation, DNA)                                |

|                                  |                                                                                                                                                                                                                                                                                                            |                         |                                                                                                |                                 |                                                                                 |                                                    |                                                                                                                                                                                                                                                                                                                                                  |
|----------------------------------|------------------------------------------------------------------------------------------------------------------------------------------------------------------------------------------------------------------------------------------------------------------------------------------------------------|-------------------------|------------------------------------------------------------------------------------------------|---------------------------------|---------------------------------------------------------------------------------|----------------------------------------------------|--------------------------------------------------------------------------------------------------------------------------------------------------------------------------------------------------------------------------------------------------------------------------------------------------------------------------------------------------|
|                                  | forming the background for special studies concerning aetiology, prevention and treatment of various disease entities, especially ischaemic heart disease, stroke and lung diseases; studying genetics, psychosocial factors, arthritis, epilepsy, dementia, excessive alcohol intake and microalbuminuria |                         |                                                                                                |                                 |                                                                                 |                                                    | -Echocardiography, PWV, ABI; Bio-sampling (including Hba1c, CRp, DNA, mRNA)                                                                                                                                                                                                                                                                      |
| Hamburg City Health Study [4, 5] | identifying novel risk factors for major diseases such as coronary artery disease (CAD), atrial fibrillation (AF), heart failure (HF), dementia and stroke. Further interests: prostate and skin cancer, kidney disease, dental disease                                                                    | since 2015 (recruiting) | Monocentric (UKE, Hamburg, Germany) prospective middle-aged to elderly population-based cohort | n= 45.000<br>Longterm follow-up | Adults 45-74 years randomly selected from the population of the City of Hamburg |                                                    | <u>Baseline: all</u><br>History<br>Anthropometry<br>ECG, vascular function, Echocardiography<br>Carotid and femoral ultrasound<br>Venous ultrasound<br>Pulmonary function<br>Bio-sampling (Blood and Saliva)<br>Skin Screening<br><br><u>Baseline: high risk participants</u><br>Sleep Apnoea Screening<br>Holter ECG<br>Brain MRI<br>Cardio MRI |
| Lifelines [6]                    | establish a major biobank available for research on                                                                                                                                                                                                                                                        | since 2006              | Regional (northern Netherlands)                                                                | n= 167.000<br>30 years          | Random sample of the regional population                                        | to provide data from the Biobank for international | <u>Baseline</u><br>Anthropometry, ECG, Pulmonary function,                                                                                                                                                                                                                                                                                       |

|                                                                                                          |                                                                                                                                                                                                                                                                                                                  |                                            |                                                                               |                                                                 |                                                                                                                                                                                        |                                                                                                                                                  |                                                                                                                                                                                                                                                                                                                                                                            |
|----------------------------------------------------------------------------------------------------------|------------------------------------------------------------------------------------------------------------------------------------------------------------------------------------------------------------------------------------------------------------------------------------------------------------------|--------------------------------------------|-------------------------------------------------------------------------------|-----------------------------------------------------------------|----------------------------------------------------------------------------------------------------------------------------------------------------------------------------------------|--------------------------------------------------------------------------------------------------------------------------------------------------|----------------------------------------------------------------------------------------------------------------------------------------------------------------------------------------------------------------------------------------------------------------------------------------------------------------------------------------------------------------------------|
|                                                                                                          | mechanisms of healthy ageing and the development of (chronic) diseases to develop personalized medicine strategies                                                                                                                                                                                               | (recruitment completed in 2013)            | Prospective population-based cohort                                           |                                                                 | spanning three generations; 67% of the participants have family relations in the cohort                                                                                                | research projects upon request via a remote workspace system                                                                                     | AGE-Reading, Neuropsychiatric exam (MINI) Cognition (MMSE), Biosampling (blood, urine) + Genomics (n= 15500 participants), questionnaires (demography socioeconomic, history, medications, physical activity, nutrition, behavioral risk factors, stress)<br><br><u>Every 1.5 years</u><br>Questionnaire (demographic Health)<br><u>Every 5 years</u><br>Study examination |
| The Rotterdam Study [7]                                                                                  | to evaluate numerous aspects of numerous diseases in the elderly; for cardiovascular disease, the focus is on evaluating lifestyle risk factors, to identify biomarkers and novel mechanisms using genomics, epigenetics and metabolomics, prediction of women's cv health, high risk predictors of CVD, imaging | since 1990                                 | Regional (Rotterdam, Netherlands) middle-aged to elderly                      | n= 14.900 (currently expanded by 4000 persons aged 40-44 years) | Adults aged 45 or older from the City of Rotterdam                                                                                                                                     | Development of a variety of diseases (coronary artery disease, AHF, ACS, stroke, Parkinson, Alzheimer, depression, anxiety, COPD, diabetes etc.) | <u>Baseline</u><br>Questionnaires<br>MRI: heart, blood vessels, brain (and eyes, skeleton)<br>Bio-sampling (for metabolomics and genomics)<br><br><u>Longterm Follow up</u><br>Clinical course                                                                                                                                                                             |
| The BioImage Study- A clinical Study of Burden of Atherosclerotic Disease in an At-Risk-Population [8,9] | to identify imaging (and other) biomarkers that predict near-term (3-year) atherothrombotic events, with incremental improvement over traditional risk assessment (Framingham Risk Score)                                                                                                                        | since 2008 (recruitment completed in 2009) | Multi-center (USA) prospective middle-aged to elderly population-based cohort | n= 7687<br><br>at least 3 years                                 | men from 55-80 yrs and women from 60-80 yrs from two urban US-region recruited in a 1:1; all without history of CVD; 80% of the population had at least one established CV risk factor | first major CVD events                                                                                                                           | <u>Baseline</u><br>Anthropometry, ECG, ABI, Bio-sampling (plasma, serum, RNA, DNA)<br><br><u>Baseline : imaging</u> (n= 6104)<br>coronary artery calcification (CAC) score (CT); ultrasound carotid (IMT), abdominal aorta, ABI<br><br><u>Baseline: advanced imaging</u>                                                                                                   |

|                                                                           |                                                                                                                                                                                                                                                                                                         |                                                                                                               |                                                                                     |                                               |                                             |                                                                  |                                                                                                                                                                                                |
|---------------------------------------------------------------------------|---------------------------------------------------------------------------------------------------------------------------------------------------------------------------------------------------------------------------------------------------------------------------------------------------------|---------------------------------------------------------------------------------------------------------------|-------------------------------------------------------------------------------------|-----------------------------------------------|---------------------------------------------|------------------------------------------------------------------|------------------------------------------------------------------------------------------------------------------------------------------------------------------------------------------------|
|                                                                           |                                                                                                                                                                                                                                                                                                         |                                                                                                               |                                                                                     |                                               |                                             |                                                                  | <p>carotid plaque MRI (n=525)</p> <p>coronary plaque CTA (n= 380)</p> <p>aortic/carotid inflammation PET-CT (n=180)</p> <p><u>Follow up ( 3years +)</u></p> <p>MACE</p>                        |
| <p>Nurses' Health Study (Cardiovascular Component)</p> <p>NCT00005152</p> | <p>to determine the relationships of hormonal, reproductive, dietary, and lifestyle factors, as well as biochemical and genetic factors, with the subsequent risk of coronary heart disease and other cardiovascular events; recent focus was inflammatory biomarkers, metabolomics, gut microbiota</p> | <p>since 1976 (completion scheduled for May 2019; currently continued as NHS 3 with 280.000 participants)</p> | <p>multi-center (USA) prospective cohort based on a selected female population</p>  | <p>n = 121.700 enrollment till April 2019</p> | <p>Adult nurses from 11 federal states</p>  | <p>Myocardial infarction, death from coronary artery disease</p> | <p><u>Baseline</u></p> <p>questionnaires</p> <p>Bio-sampling (genomics (n= 1186), markers of endothelial inflammation)</p> <p><u>Follow up</u></p> <p>cardiovascular events</p>                |
| <p>Multi-Ethnic Study of Atherosclerosis: objectives and design [10]</p>  | <p>investigate the prevalence, correlates, and progression of subclinical cardiovascular disease; risk prediction by machine-learning (random survival forests) in conjunction with deep phenotyping [11]</p>                                                                                           | <p>recruited from 2000-2002</p>                                                                               | <p>multi-center (USA) prospective cohort based on a population of 4 ethnicities</p> | <p>n= 6814 up to 7 yeras</p>                  | <p>adults aged 45-84 years</p>              | <p>vascular events and mortality</p>                             | <p><u>Baseline</u></p> <p>coronary calcium-CT, Cardio-MRI, brachial artery endothelial vasodilataion, carotid IMT, ABI, ECH, Blood sampling (plasma, serum, DNA)</p>                           |
| <p>German National Cohort (Gesundheitsstudie Nationale Kohorte) [12]</p>  | <p>to investigate the causes (risk factors, lifestyle, environmental, geographic, socioeconomic) for the</p>                                                                                                                                                                                            |                                                                                                               | <p>mulidentric (Germany) prospective</p>                                            | <p>n= 200.000</p>                             | <p>adults 20-69, male:female ration 1:1</p> | <p>clinical evnes</p>                                            | <p><u>Baseline</u> (*marked only in a subset of 40.000 pts)</p> <p>Anthropometry, blood pressure, herat rate, ECG, Echocardigraphy, ABI, pulse wave, longterm ECG*, sleep apnoe screening*</p> |

|  |                                                                                                                                                                                                 |  |  |  |  |                                                                                                                                                                                                                                                                                                                                                                                                                                    |
|--|-------------------------------------------------------------------------------------------------------------------------------------------------------------------------------------------------|--|--|--|--|------------------------------------------------------------------------------------------------------------------------------------------------------------------------------------------------------------------------------------------------------------------------------------------------------------------------------------------------------------------------------------------------------------------------------------|
|  | development of major chronic diseases, including, cardiovascular diseases, and their pre-clinical stages with a focus on risk prediction/biomarkers as well as or functional health impairments |  |  |  |  | Diabetes: OGTT, AGE reader*<br>Cognition<br>Lung function<br>Oral health<br>Sensory (retinal scan*, visus*, hearing test*, olfactory test)<br>Physical activity<br>Bio-sampling (Serum, Plasma, Blood, DNA, RNA, Urine, Saliva, nasal swab, hair)<br>History, multiple specific questionnaires<br>MRI program (n= 30.000): brain, cardial, whole body<br><u>4-5 years</u><br>as above, but reduced bio-sampling and except for MRI |
|--|-------------------------------------------------------------------------------------------------------------------------------------------------------------------------------------------------|--|--|--|--|------------------------------------------------------------------------------------------------------------------------------------------------------------------------------------------------------------------------------------------------------------------------------------------------------------------------------------------------------------------------------------------------------------------------------------|

#### References population-based cohorts

- [1] Simons PCG et al. for SMART study group: Second Manifestations of ARterial disease (SMART) study: rationale and design.. Eur J Epideiol 1999; 15:773-781
- [2] Meisinger C, Peters A, Linseisen J: From the MONICA-project vis KORA to the NAKO-study: Practical Utility of Epidemiological Studies in the Augsburg Region. Gesundheitswesen 2016; 78:84-90
- [3] Aguib Y, Suwaidi JA: The Copenhagen City Heart Study (Oesterbroundersoegelsen). Glob Cardiol Sci Pract 2015; 2015:33
- [4] <http://hchs.hamburg/>
- [5] Bohnen S et al.: Cardiovascular magnetic resonance imaging in the prospective, populations-based, Hambug City Health cohort study: objectives and design. J Cardiovasx Mag Res 2018; 20:68
- [6] Scholten S et al.: Cohort profile: LifeLines, a three-generation cohort study and biobank. Int J Epidemiol 2015; 44:1172-1180
- [7] Ikram MA et al.: The Rotterdam Study: 2018 update on objectives, design and main results. Eur J Epidemiol 2017; 9:807-850
- [8] Muntendam P et al. for the High-Risk-Plaque Initiative: The BioImage study: novel approaches to risk assessment in the primary prevention of atherosclerotic cardiovascular disease- stdesign and objectives. A Heart J 2010; 160:49-57

- [9] Baber U et al.: Prevalence, impact , and predictive value of detecting subclinical coronary and carotid atherosclerosis in asymptomatic adults. The BioImage Study. Am Coll Cardiol 2015;65:1065–74
- [10] Bild DE et al.: Multi-Ethnic study of Atherosclerosis: objectives and design. A J Epidemiol 2002; 156:871-881
- [11] Ambale-Venkatesh B et al.: Cardiovascular event prediction by machine learning. The Multi-Ethnic Study of Atherosclerosis. Circ Res 2017 ; 121:1092-11
- [12] German National Cohort (GNC) Consortium: The German National Cohort: aims, study design and organization. Eur J Epidemiol 2014; 19:371-382
